# Supplementary material
Source: publisher figshare collection journal article supplement (https://gsajournals.figshare.com/articles/dataset/_/21623121)

# Regions with zero coverage bigger than 500 bp in males for female assemblies

ChitiliLakeChL\_F

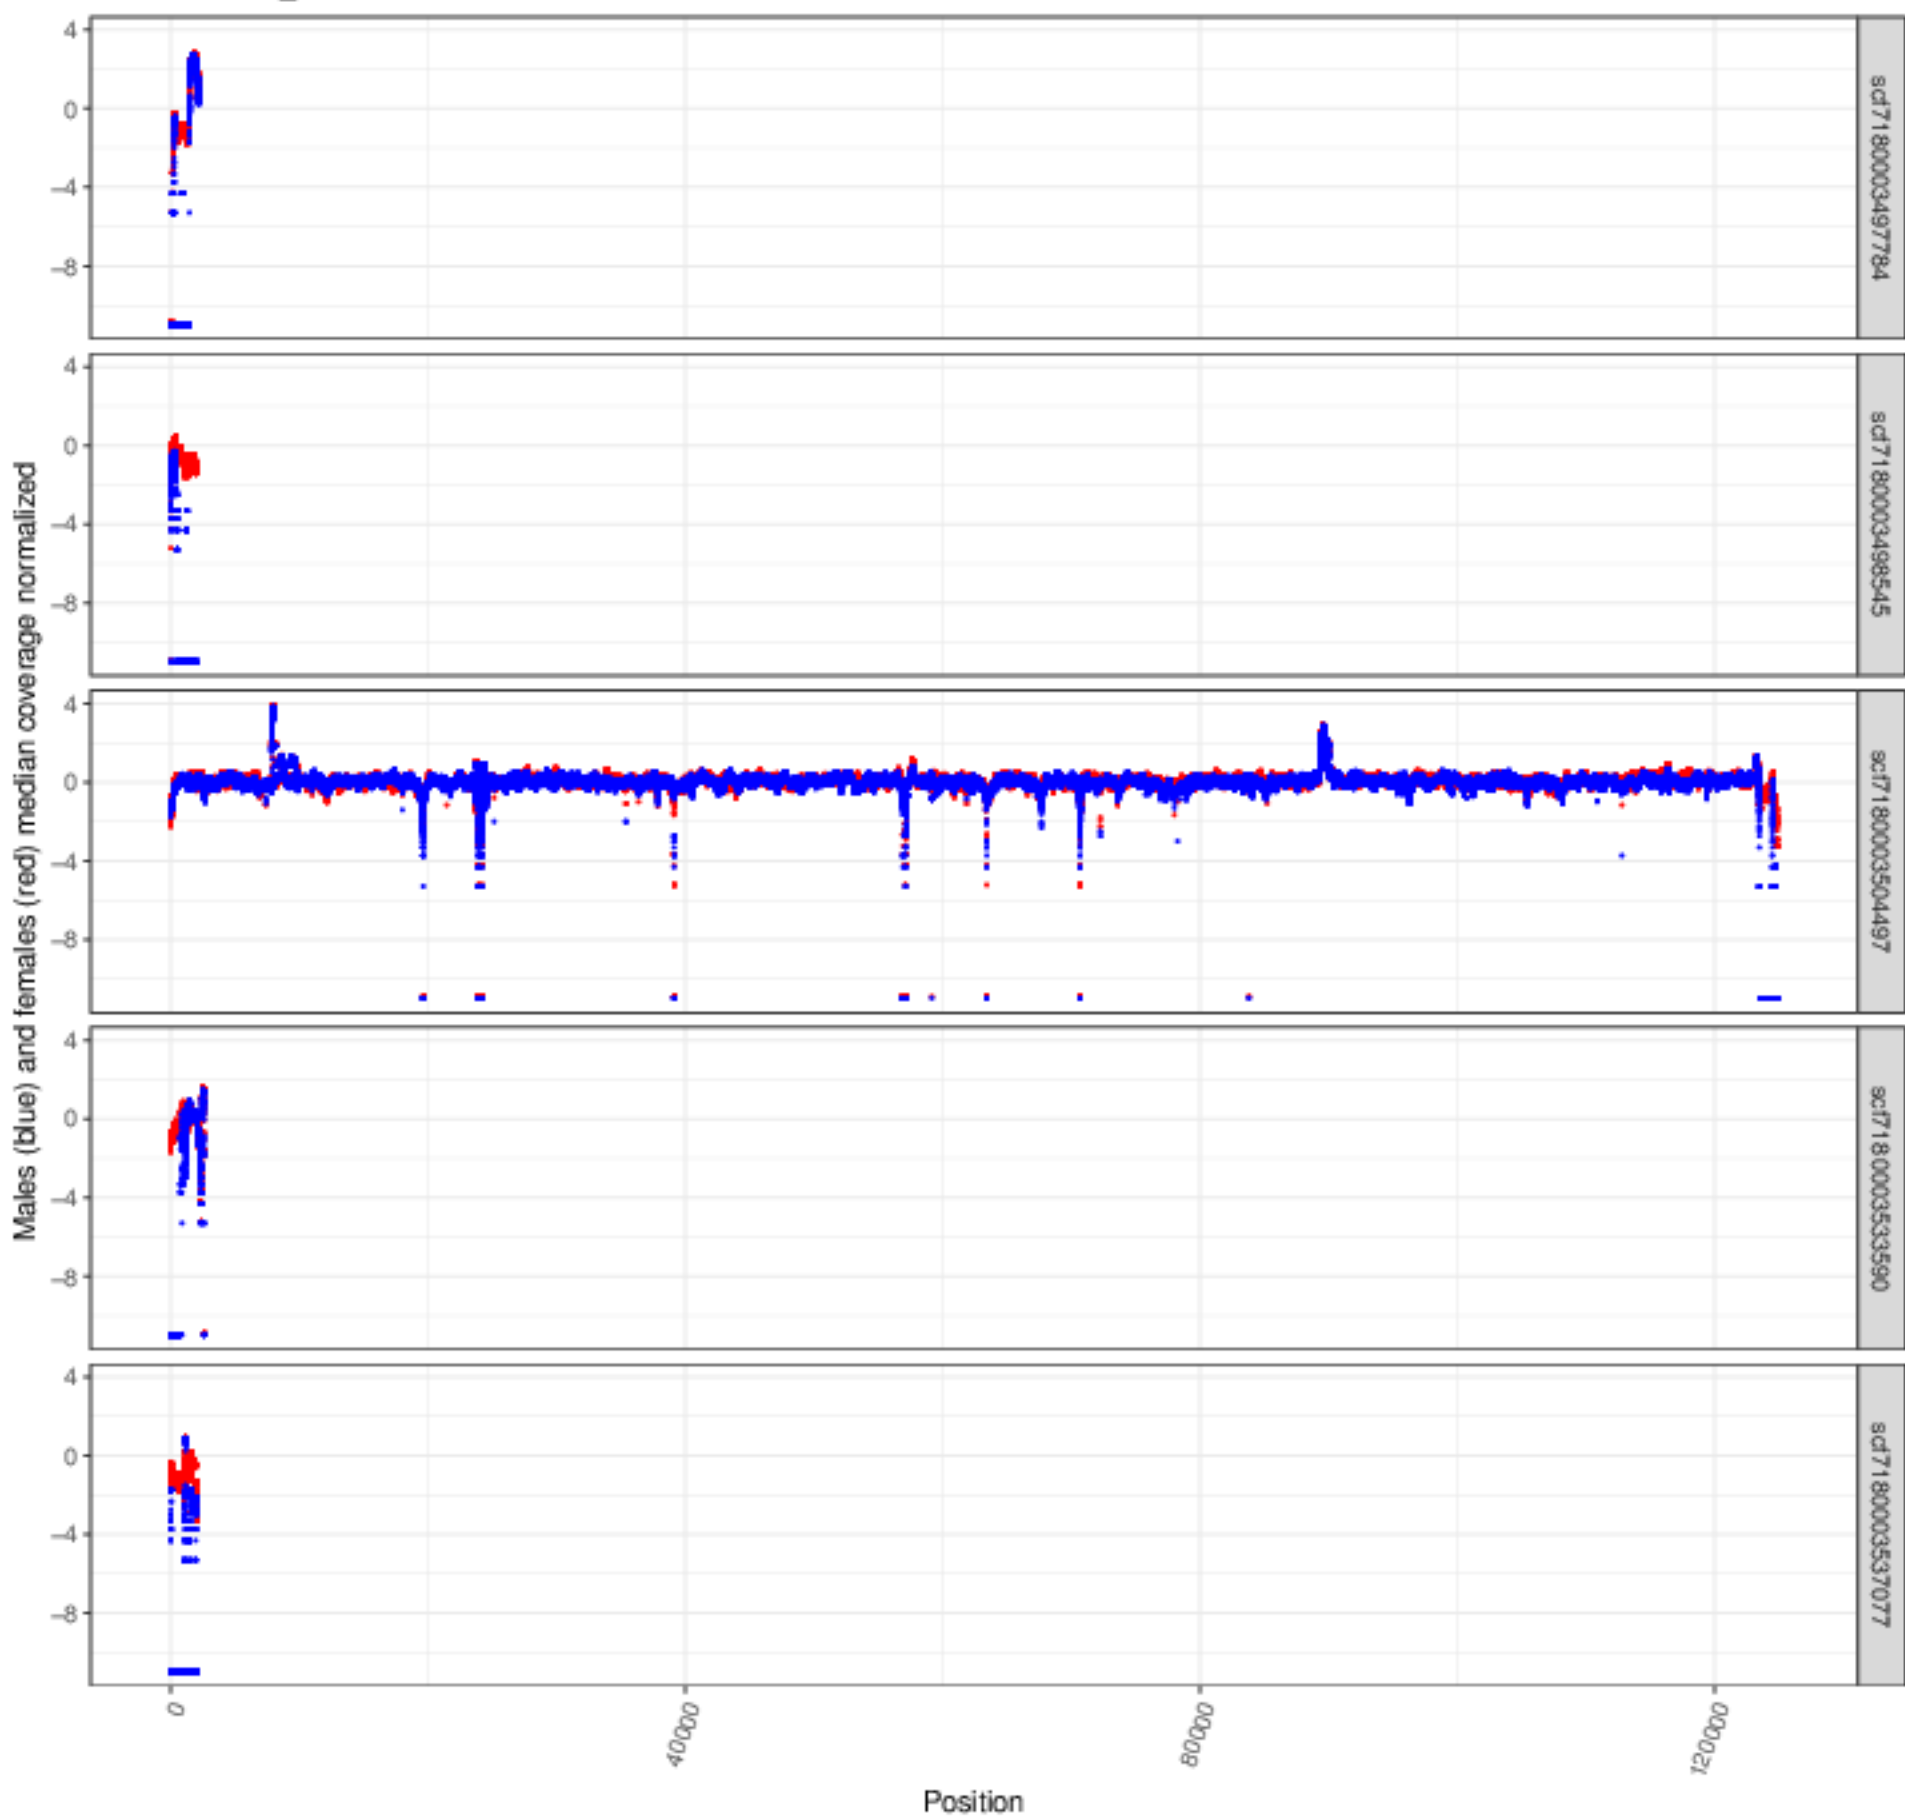

# Regions with zero coverage bigger than 500 bp in males for female assemblies

ChitiliRiverCh1\_F

Males (blue) and females (red) median coverage normalized

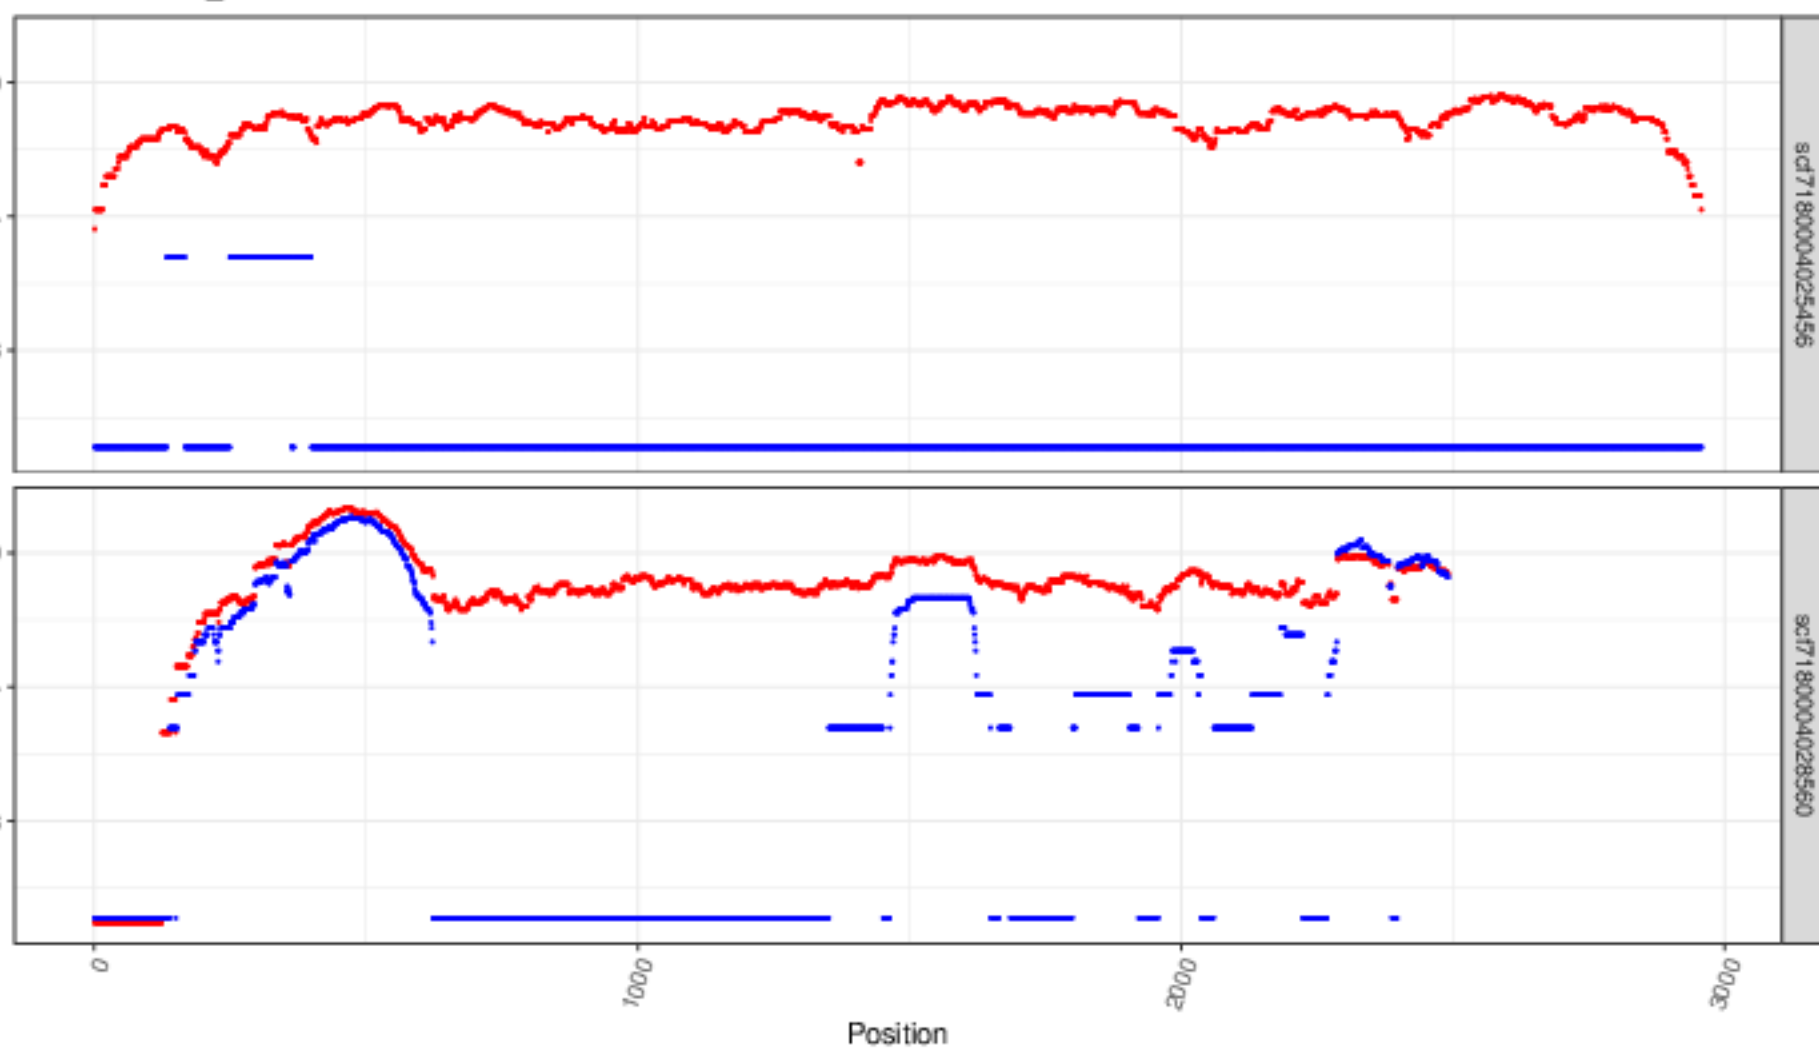

Regions with zero coverage bigger than 500 bp in males for female assemblies

KalamboLakeKaL\_F

Males (blue) and females (red) median coverage normalized

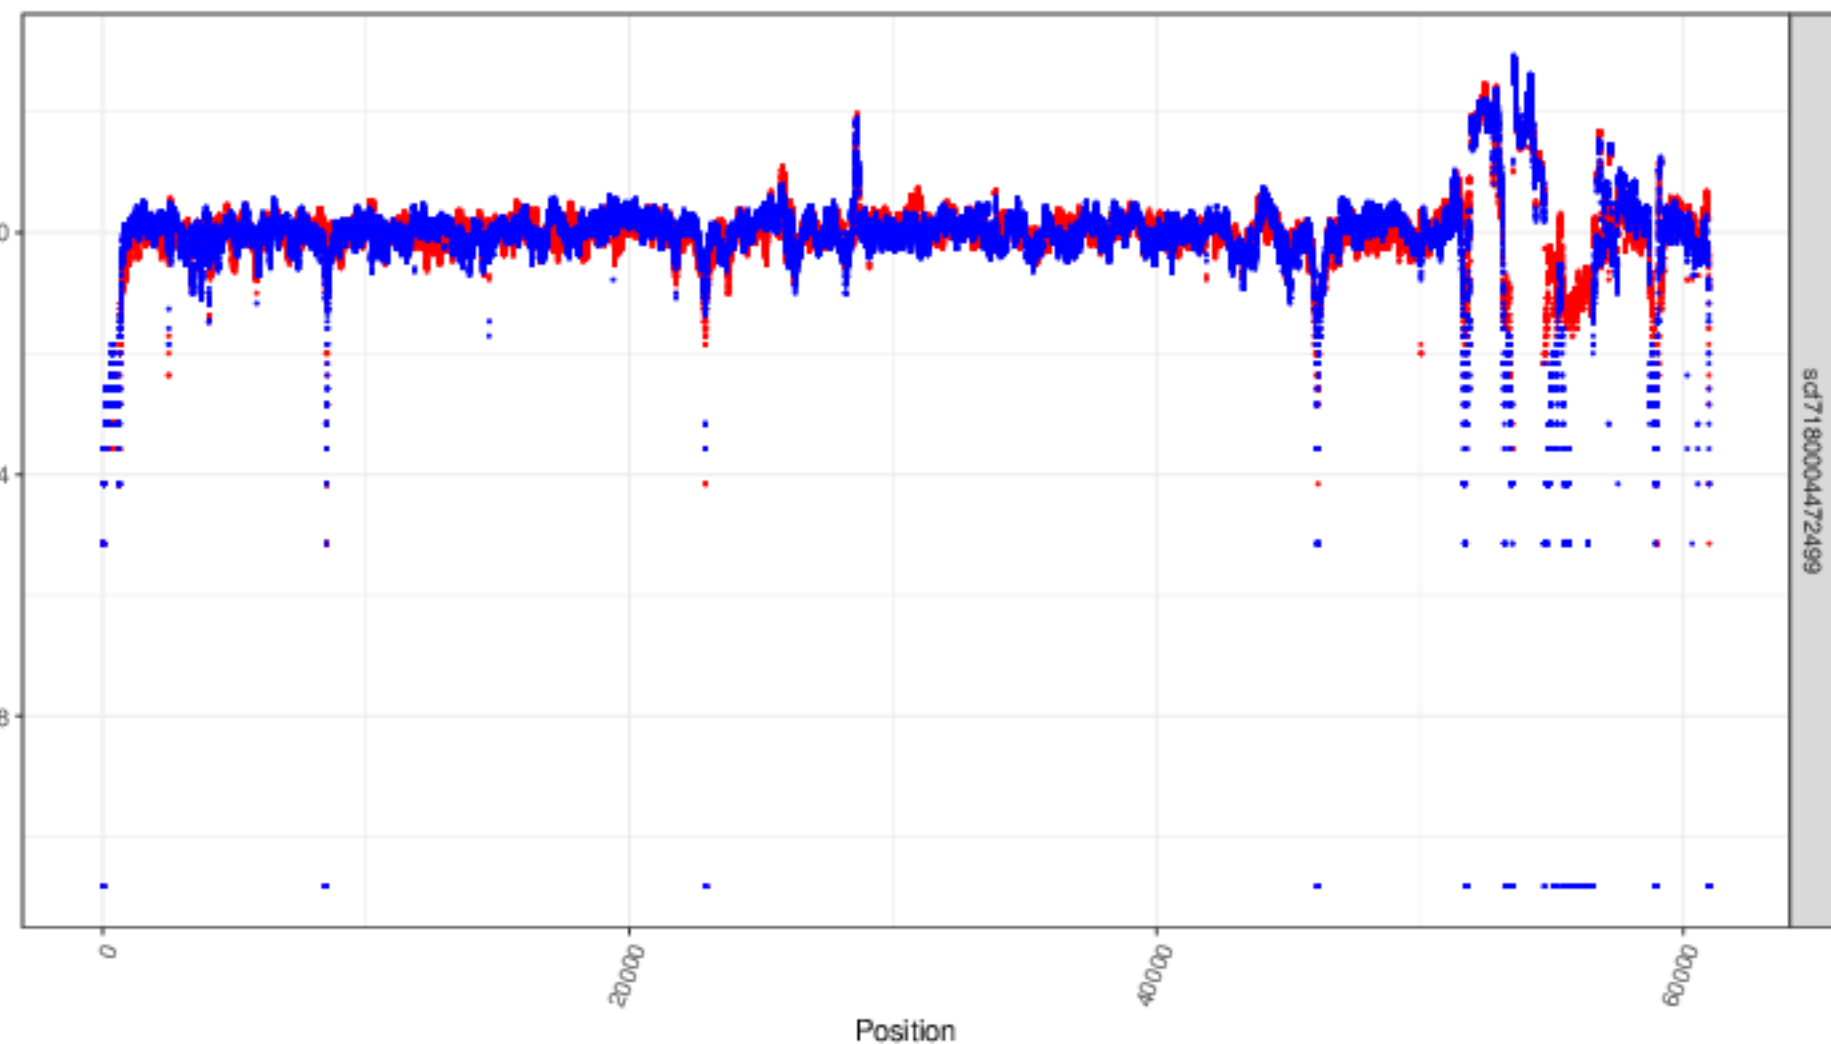

# Regions with zero coverage bigger than 500 bp in males for female assemblies

KalamboRiverKa1\_F

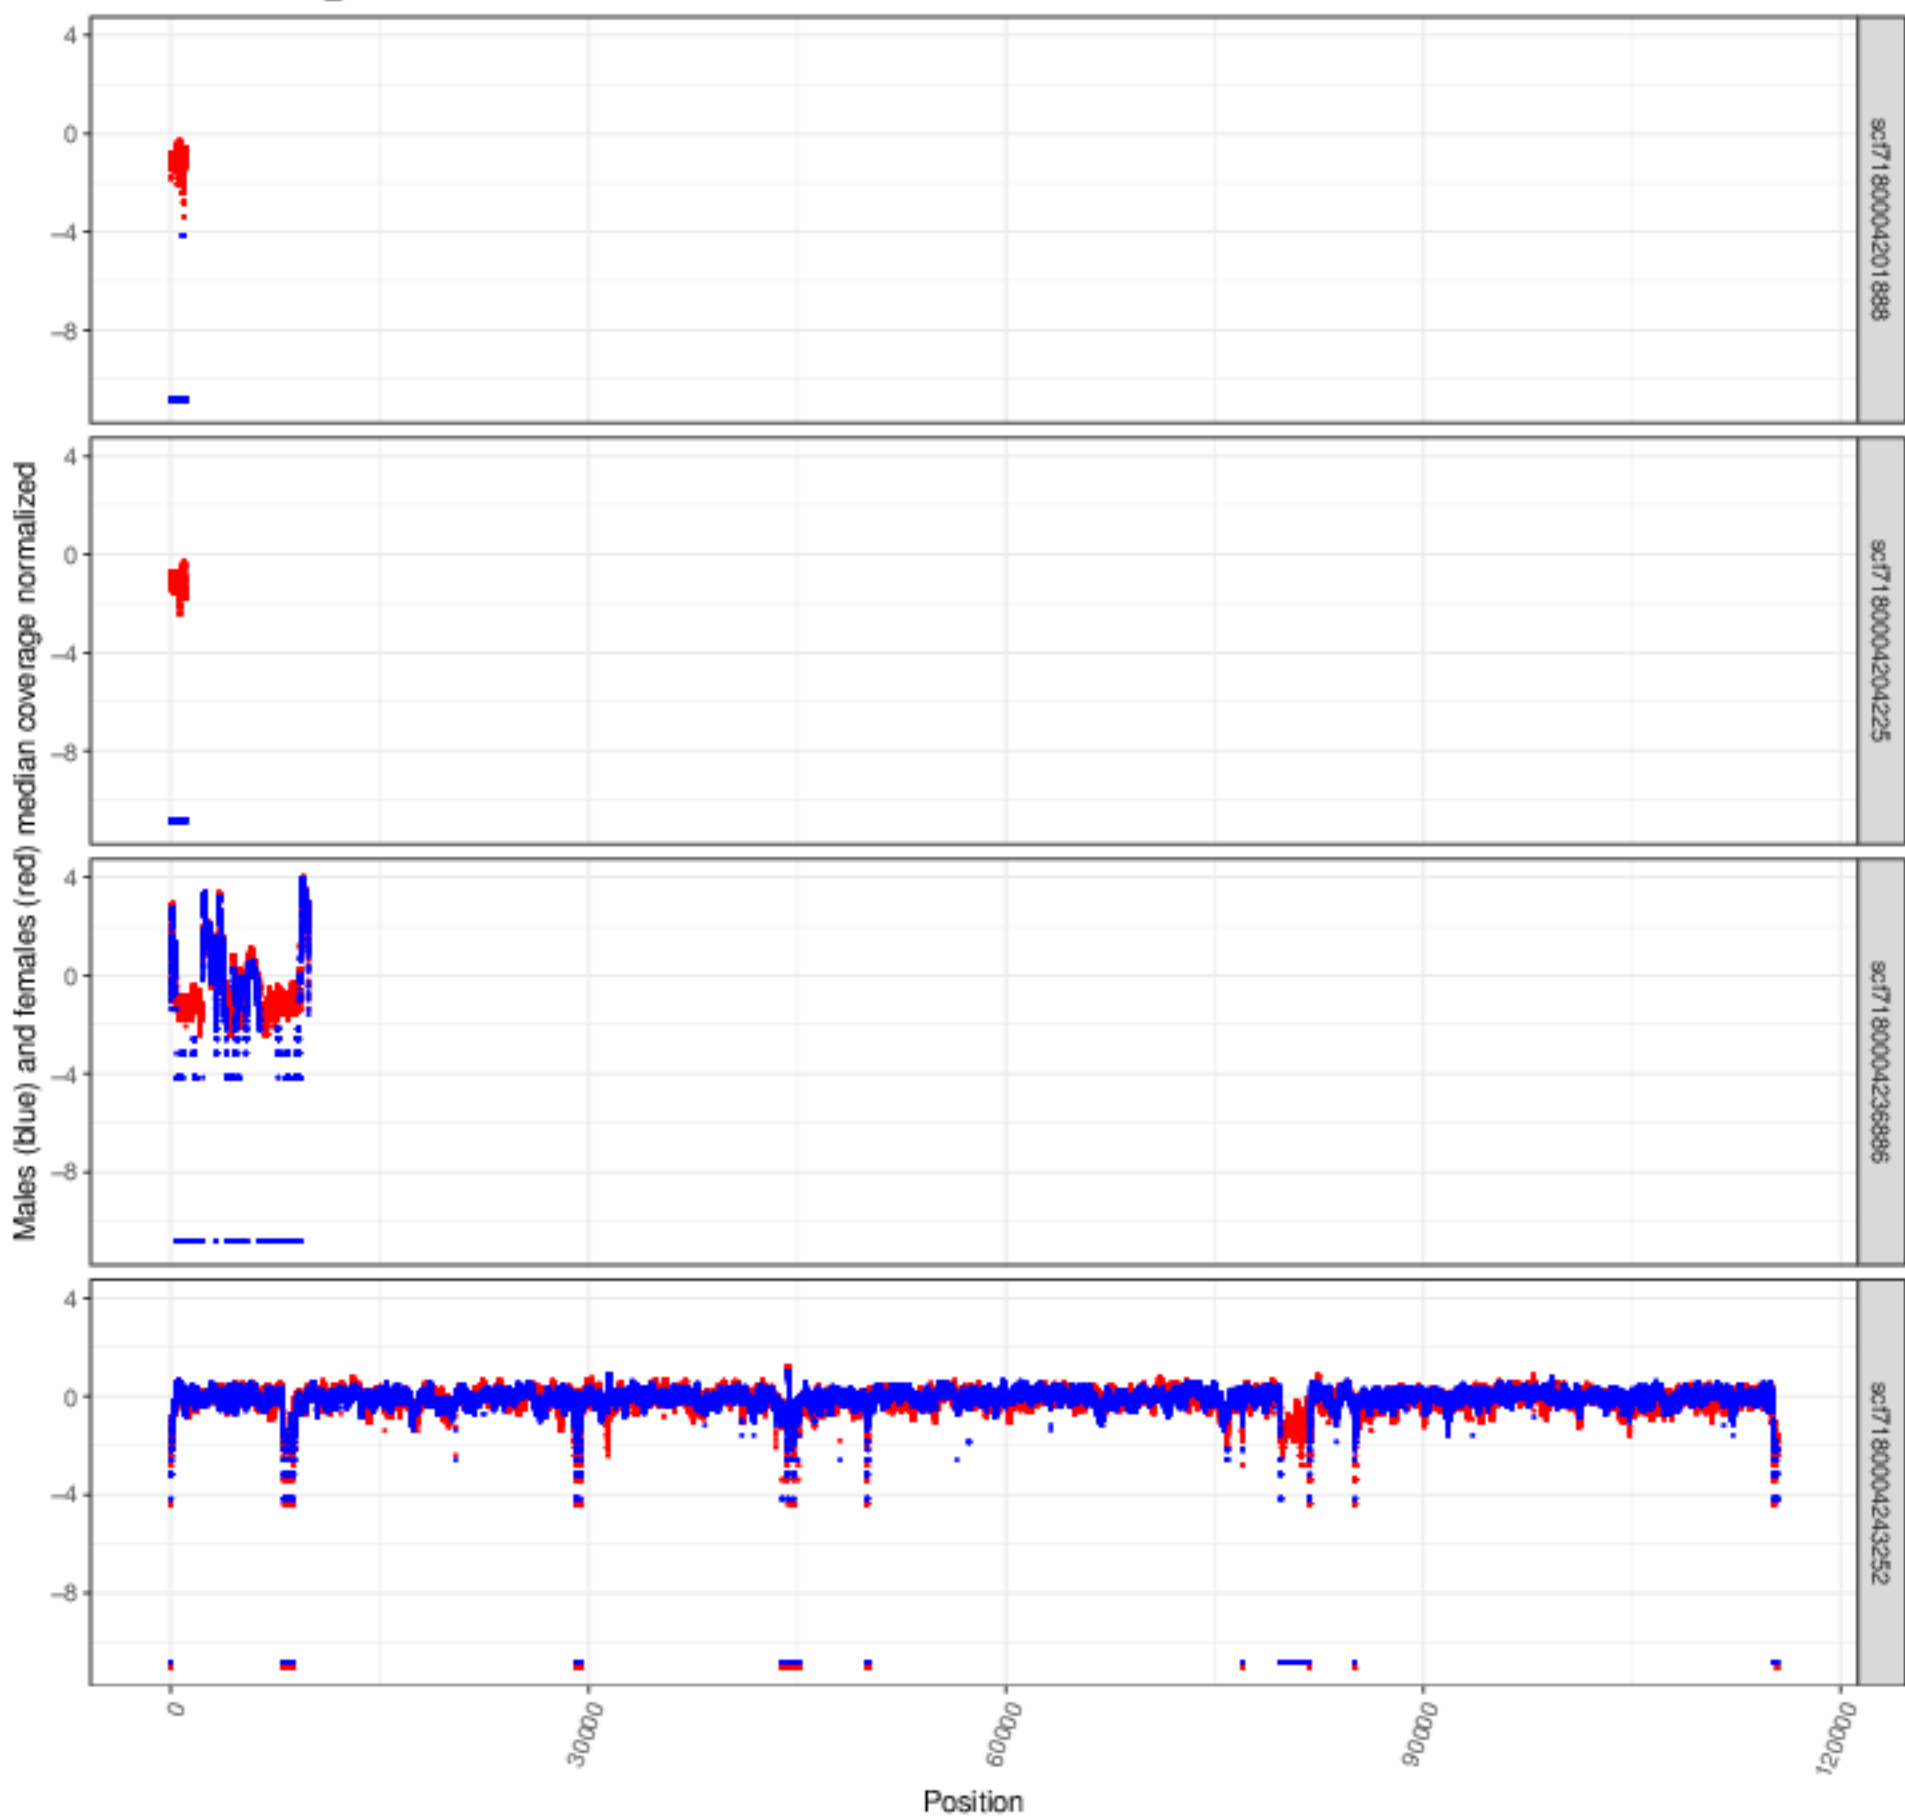

Regions with zero coverage bigger than 500 bp in males for female assemblies

KalamboRiverKa2\_F

Males (blue) and females (red) median coverage normalized

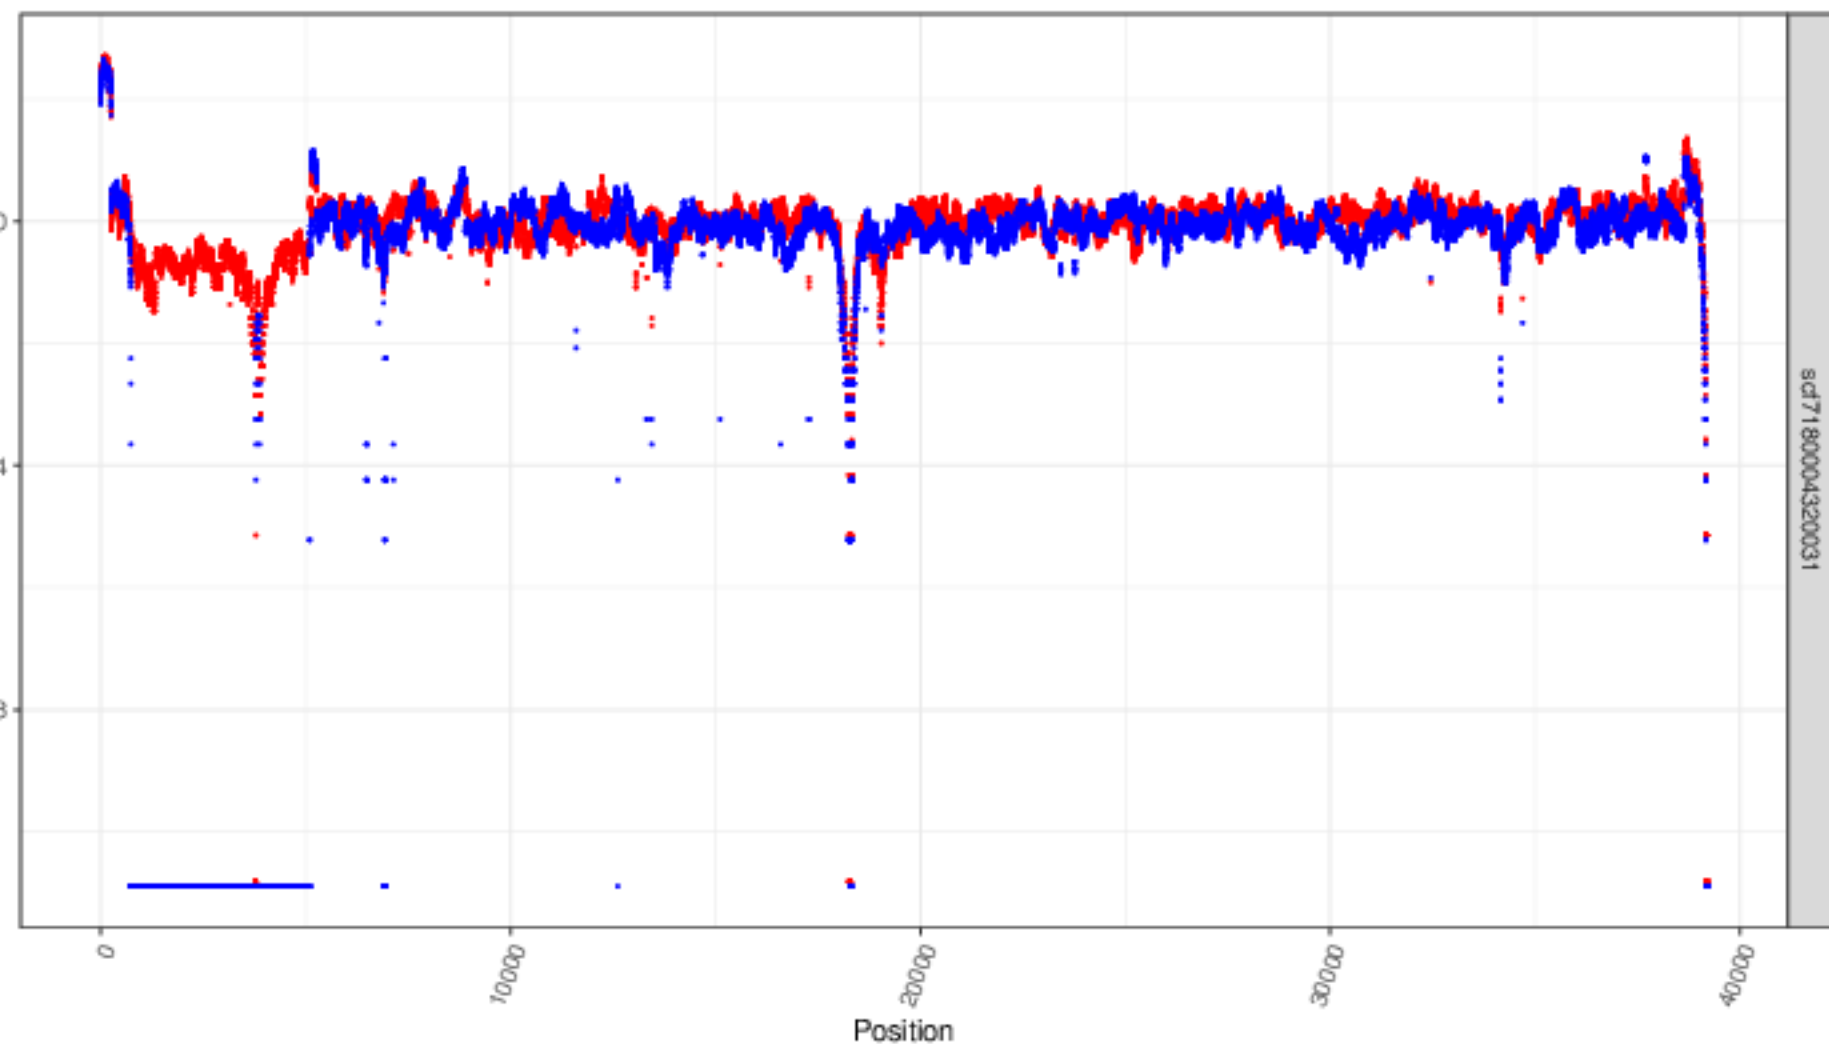

# Regions with zero coverage bigger than 500 bp in males for female assemblies

LufubuLakeLfl\_F

Males (blue) and females (red) median coverage normalized

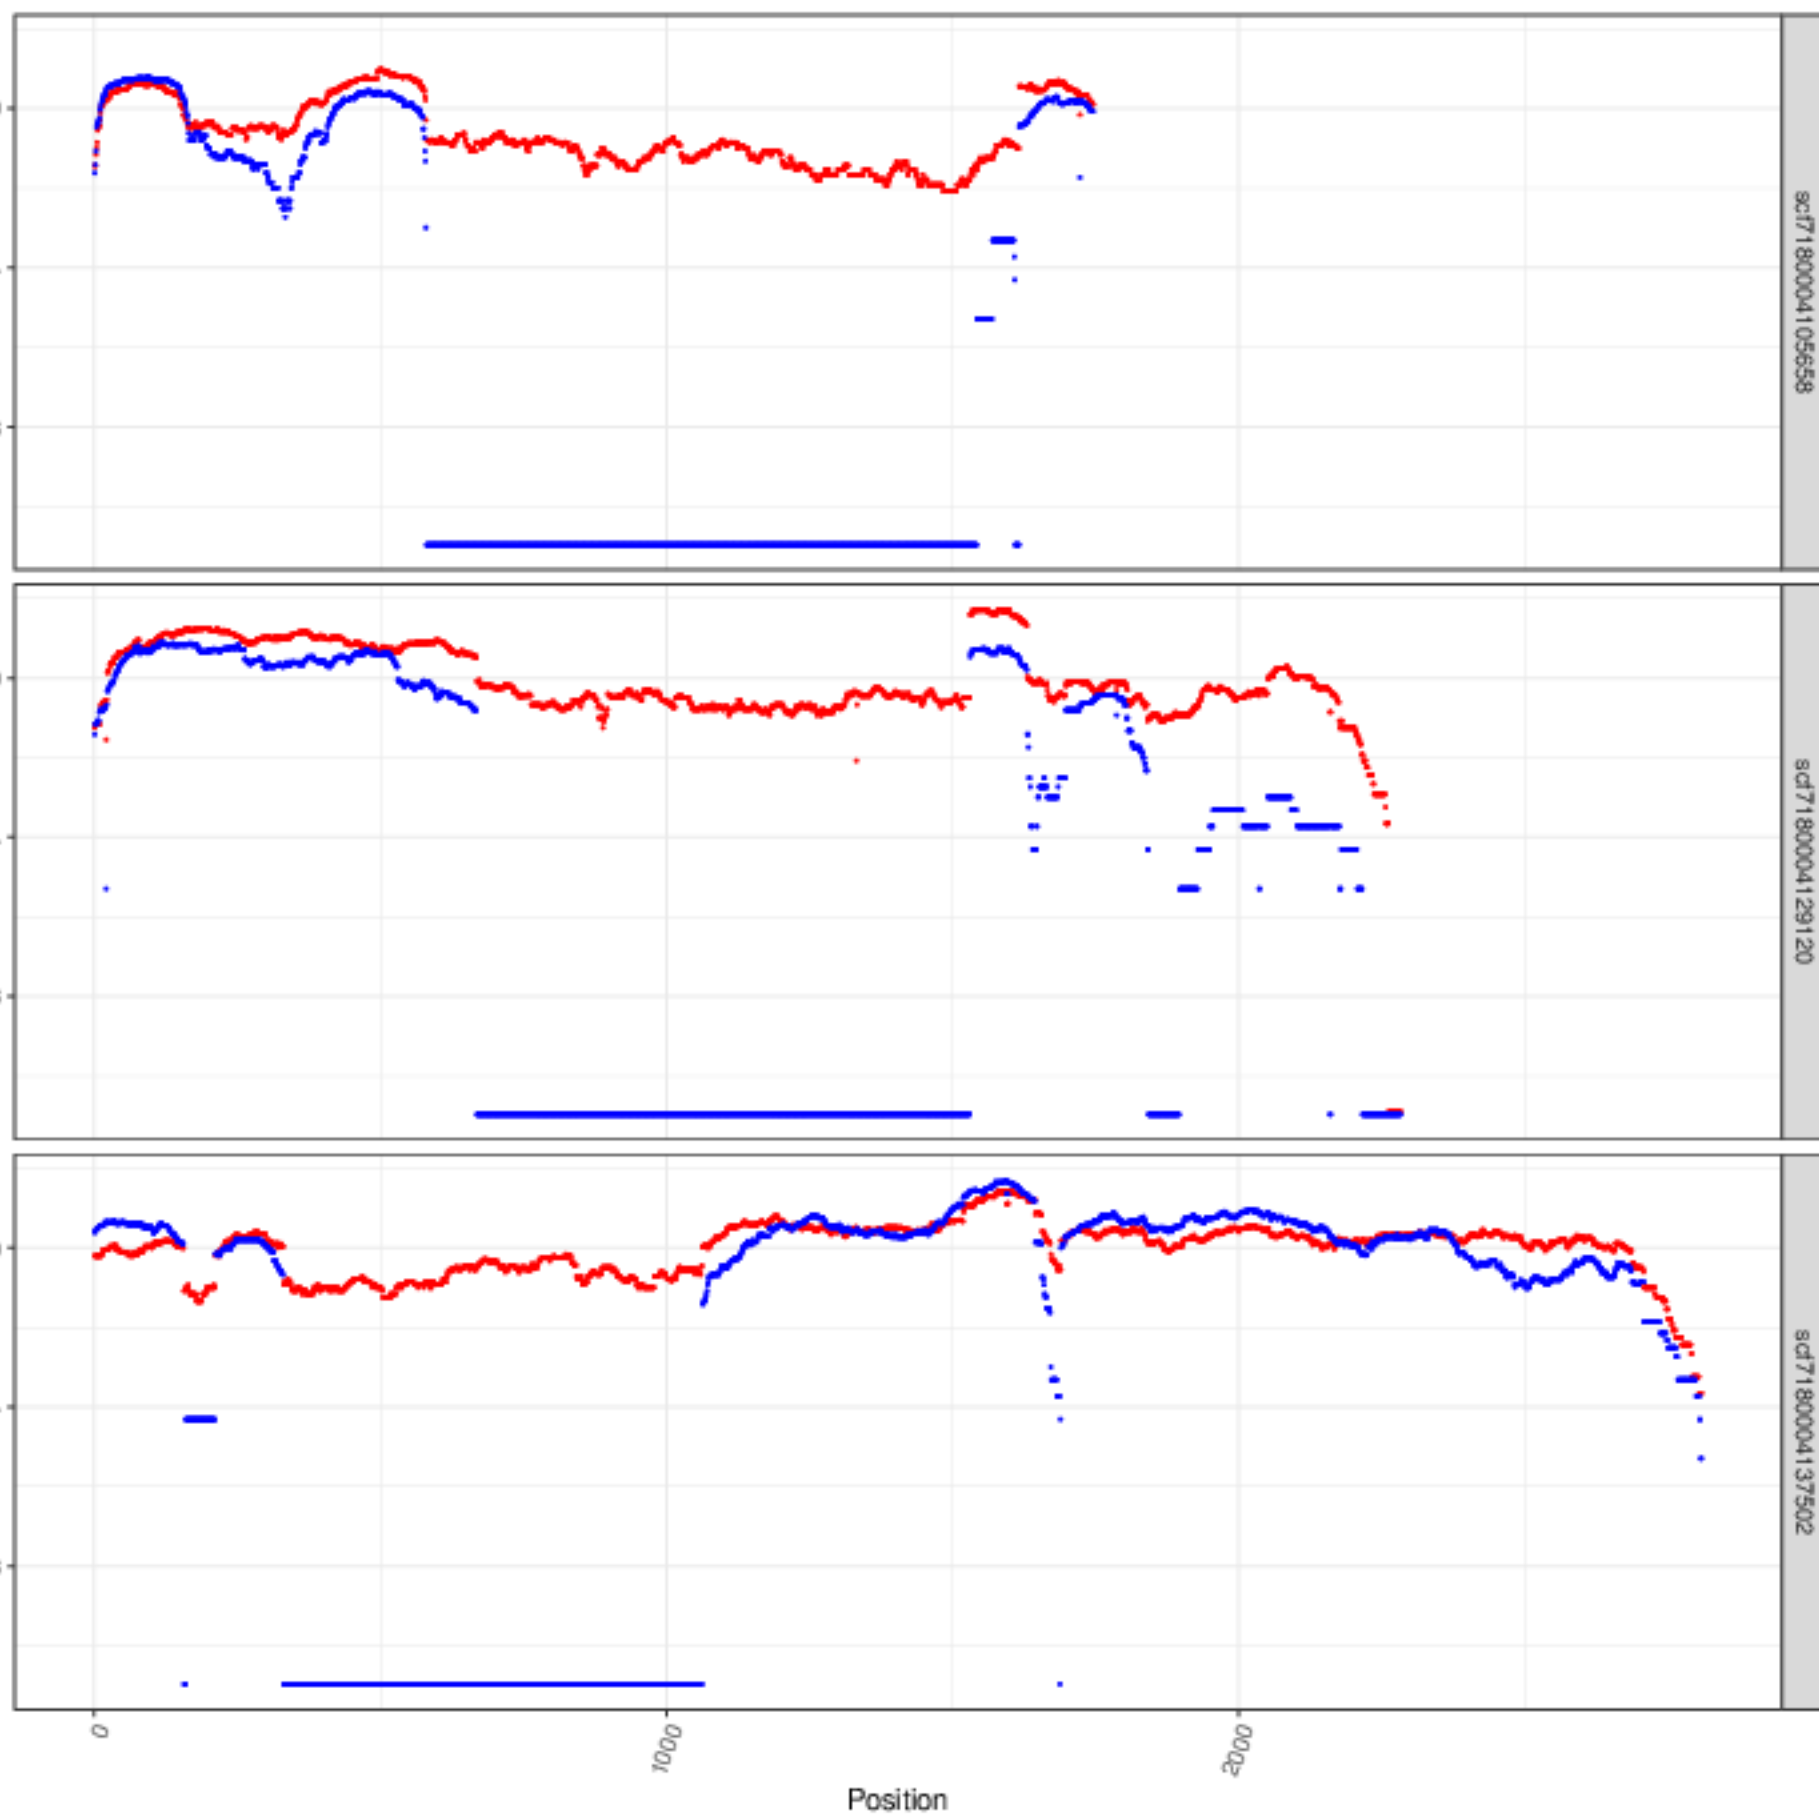

Regions with zero coverage bigger than 500 bp in males for female assemblies

LufubuRiverLf2\_F

Males (blue) and females (red) median coverage normalized

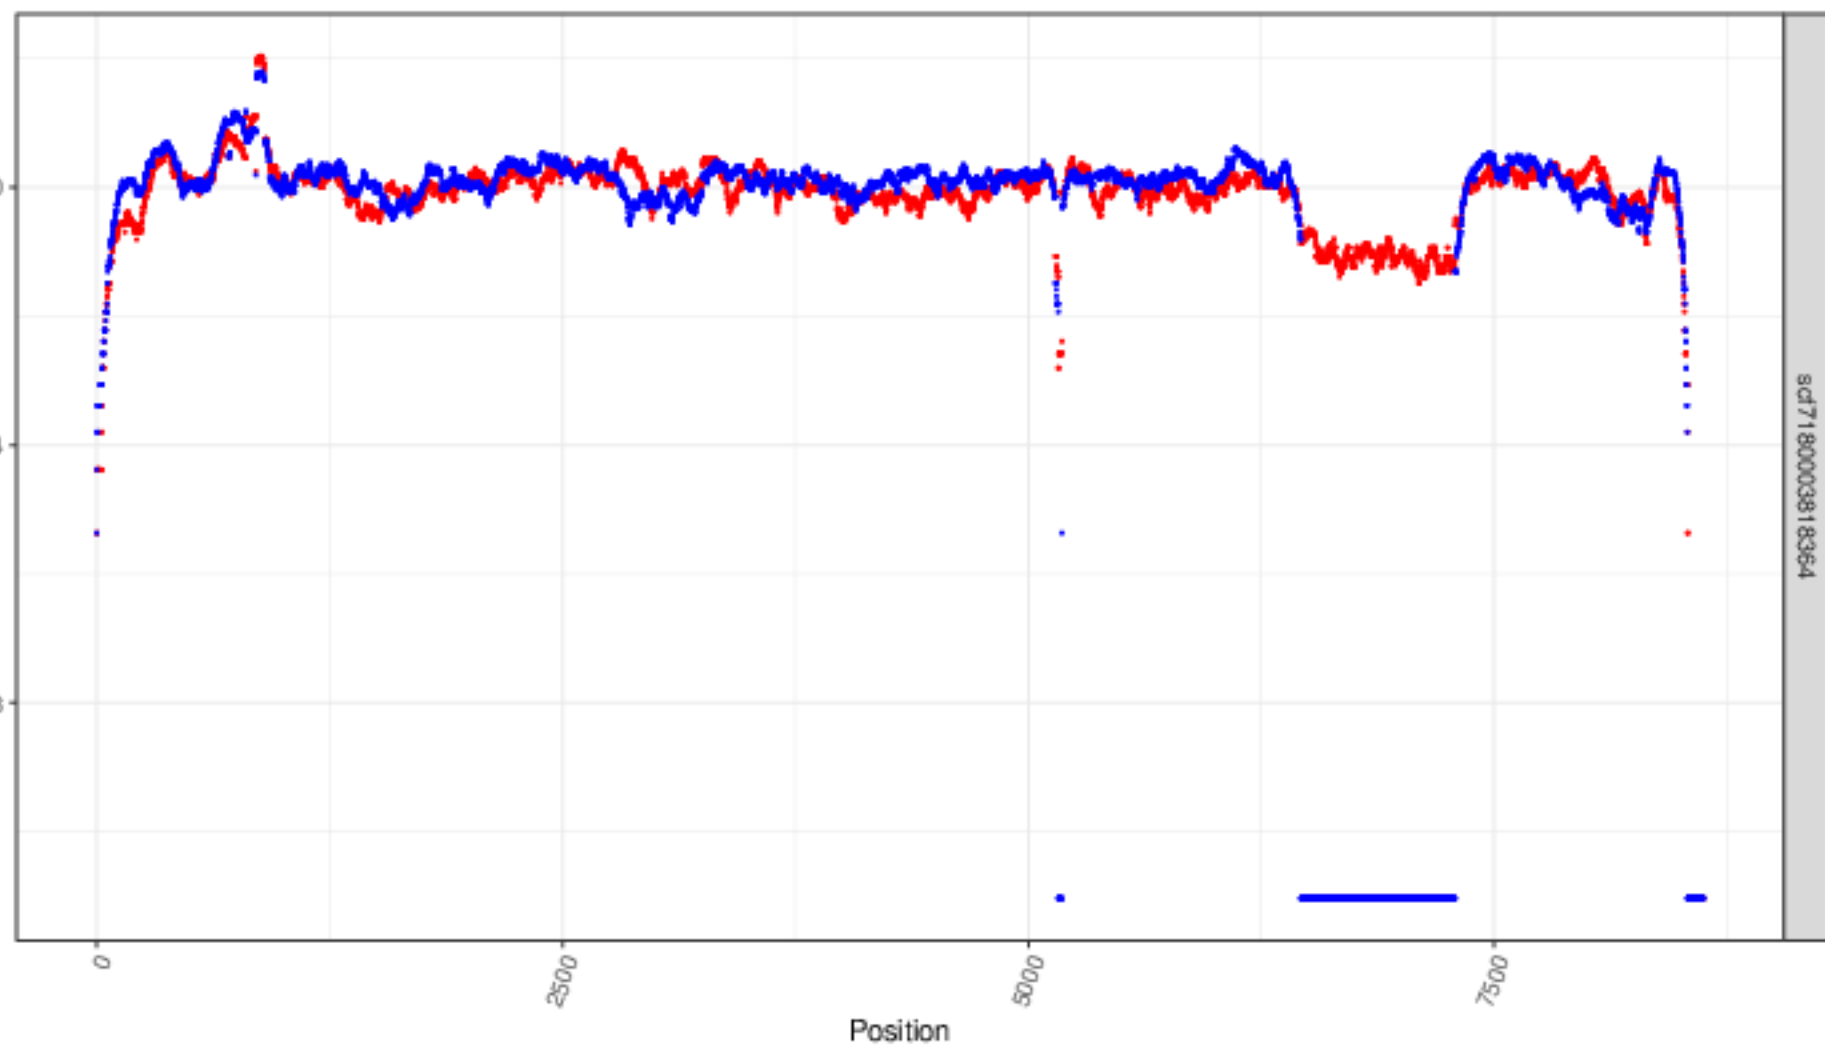

Regions with zero coverage bigger than 500 bp in males for female assemblies

LunzuaLakeLzL\_F

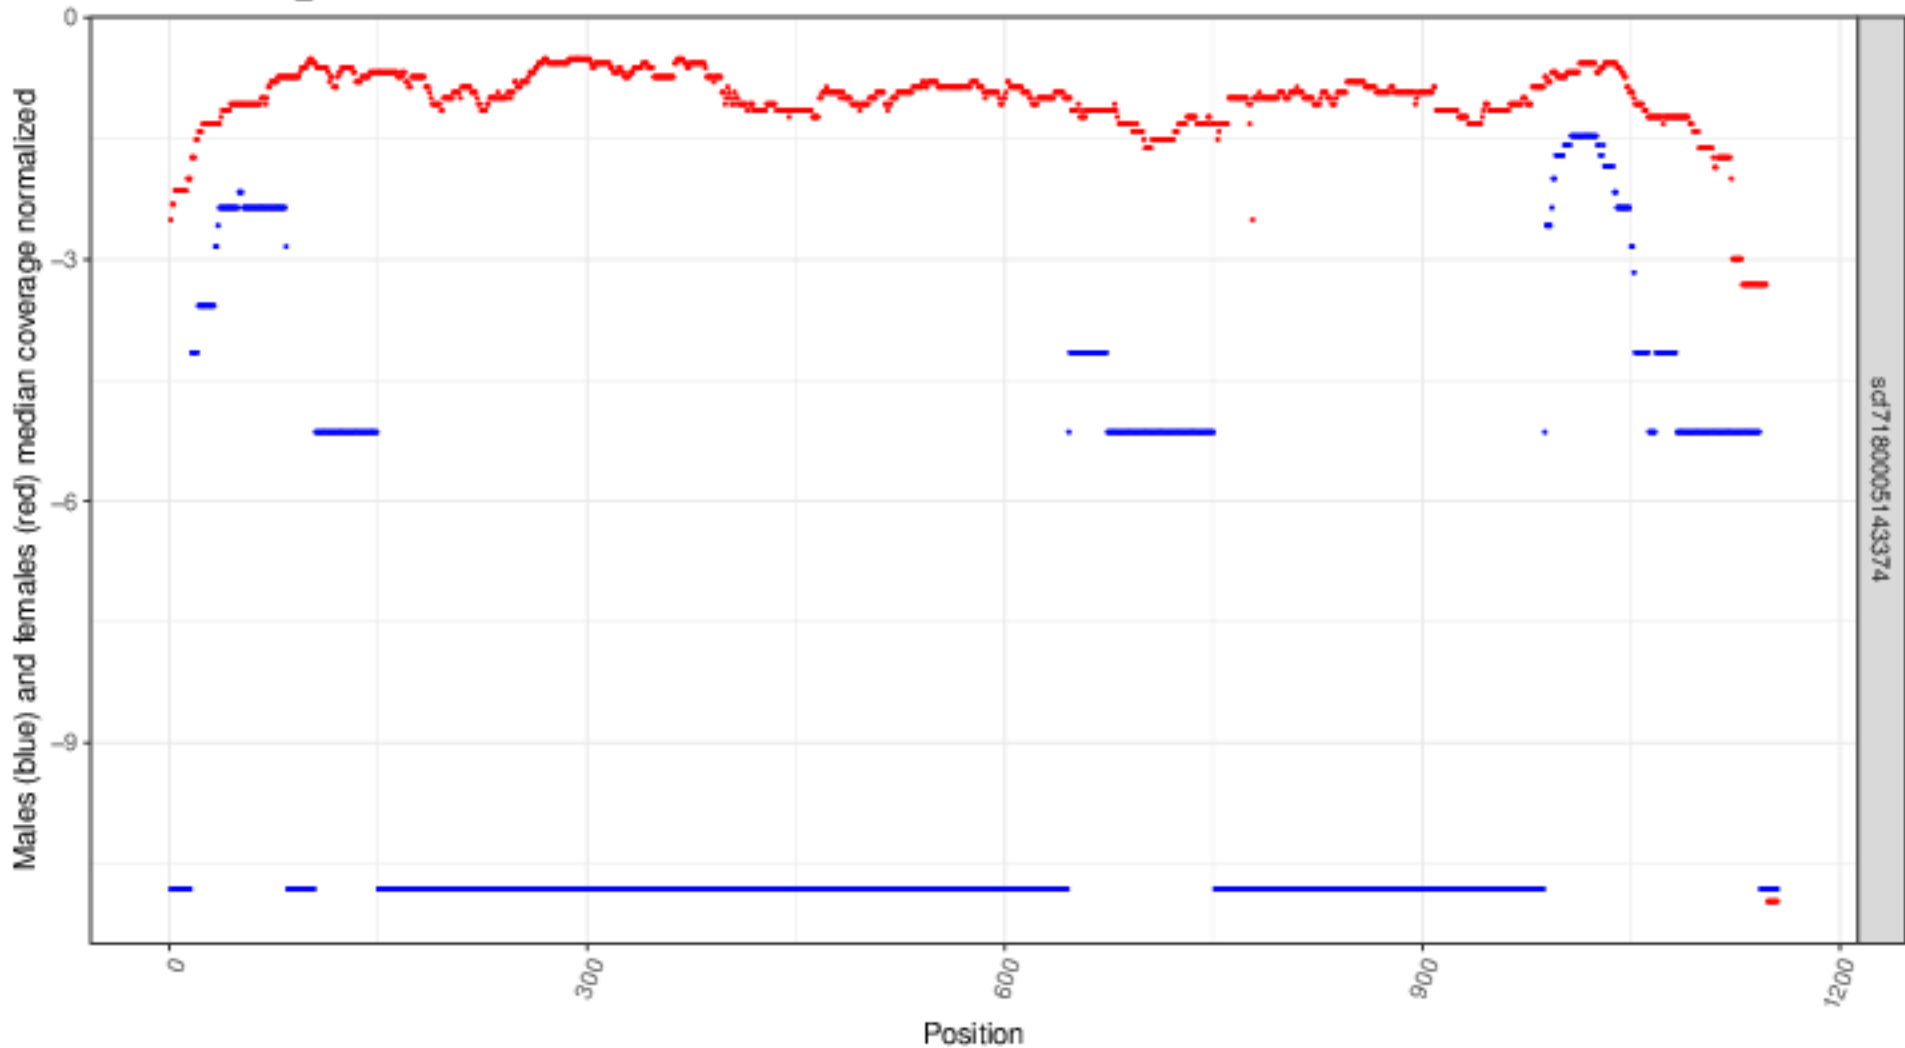



# Regions with zero coverage bigger than 500 bp in males for female assemblies

LunzuaRiverLz1\_F

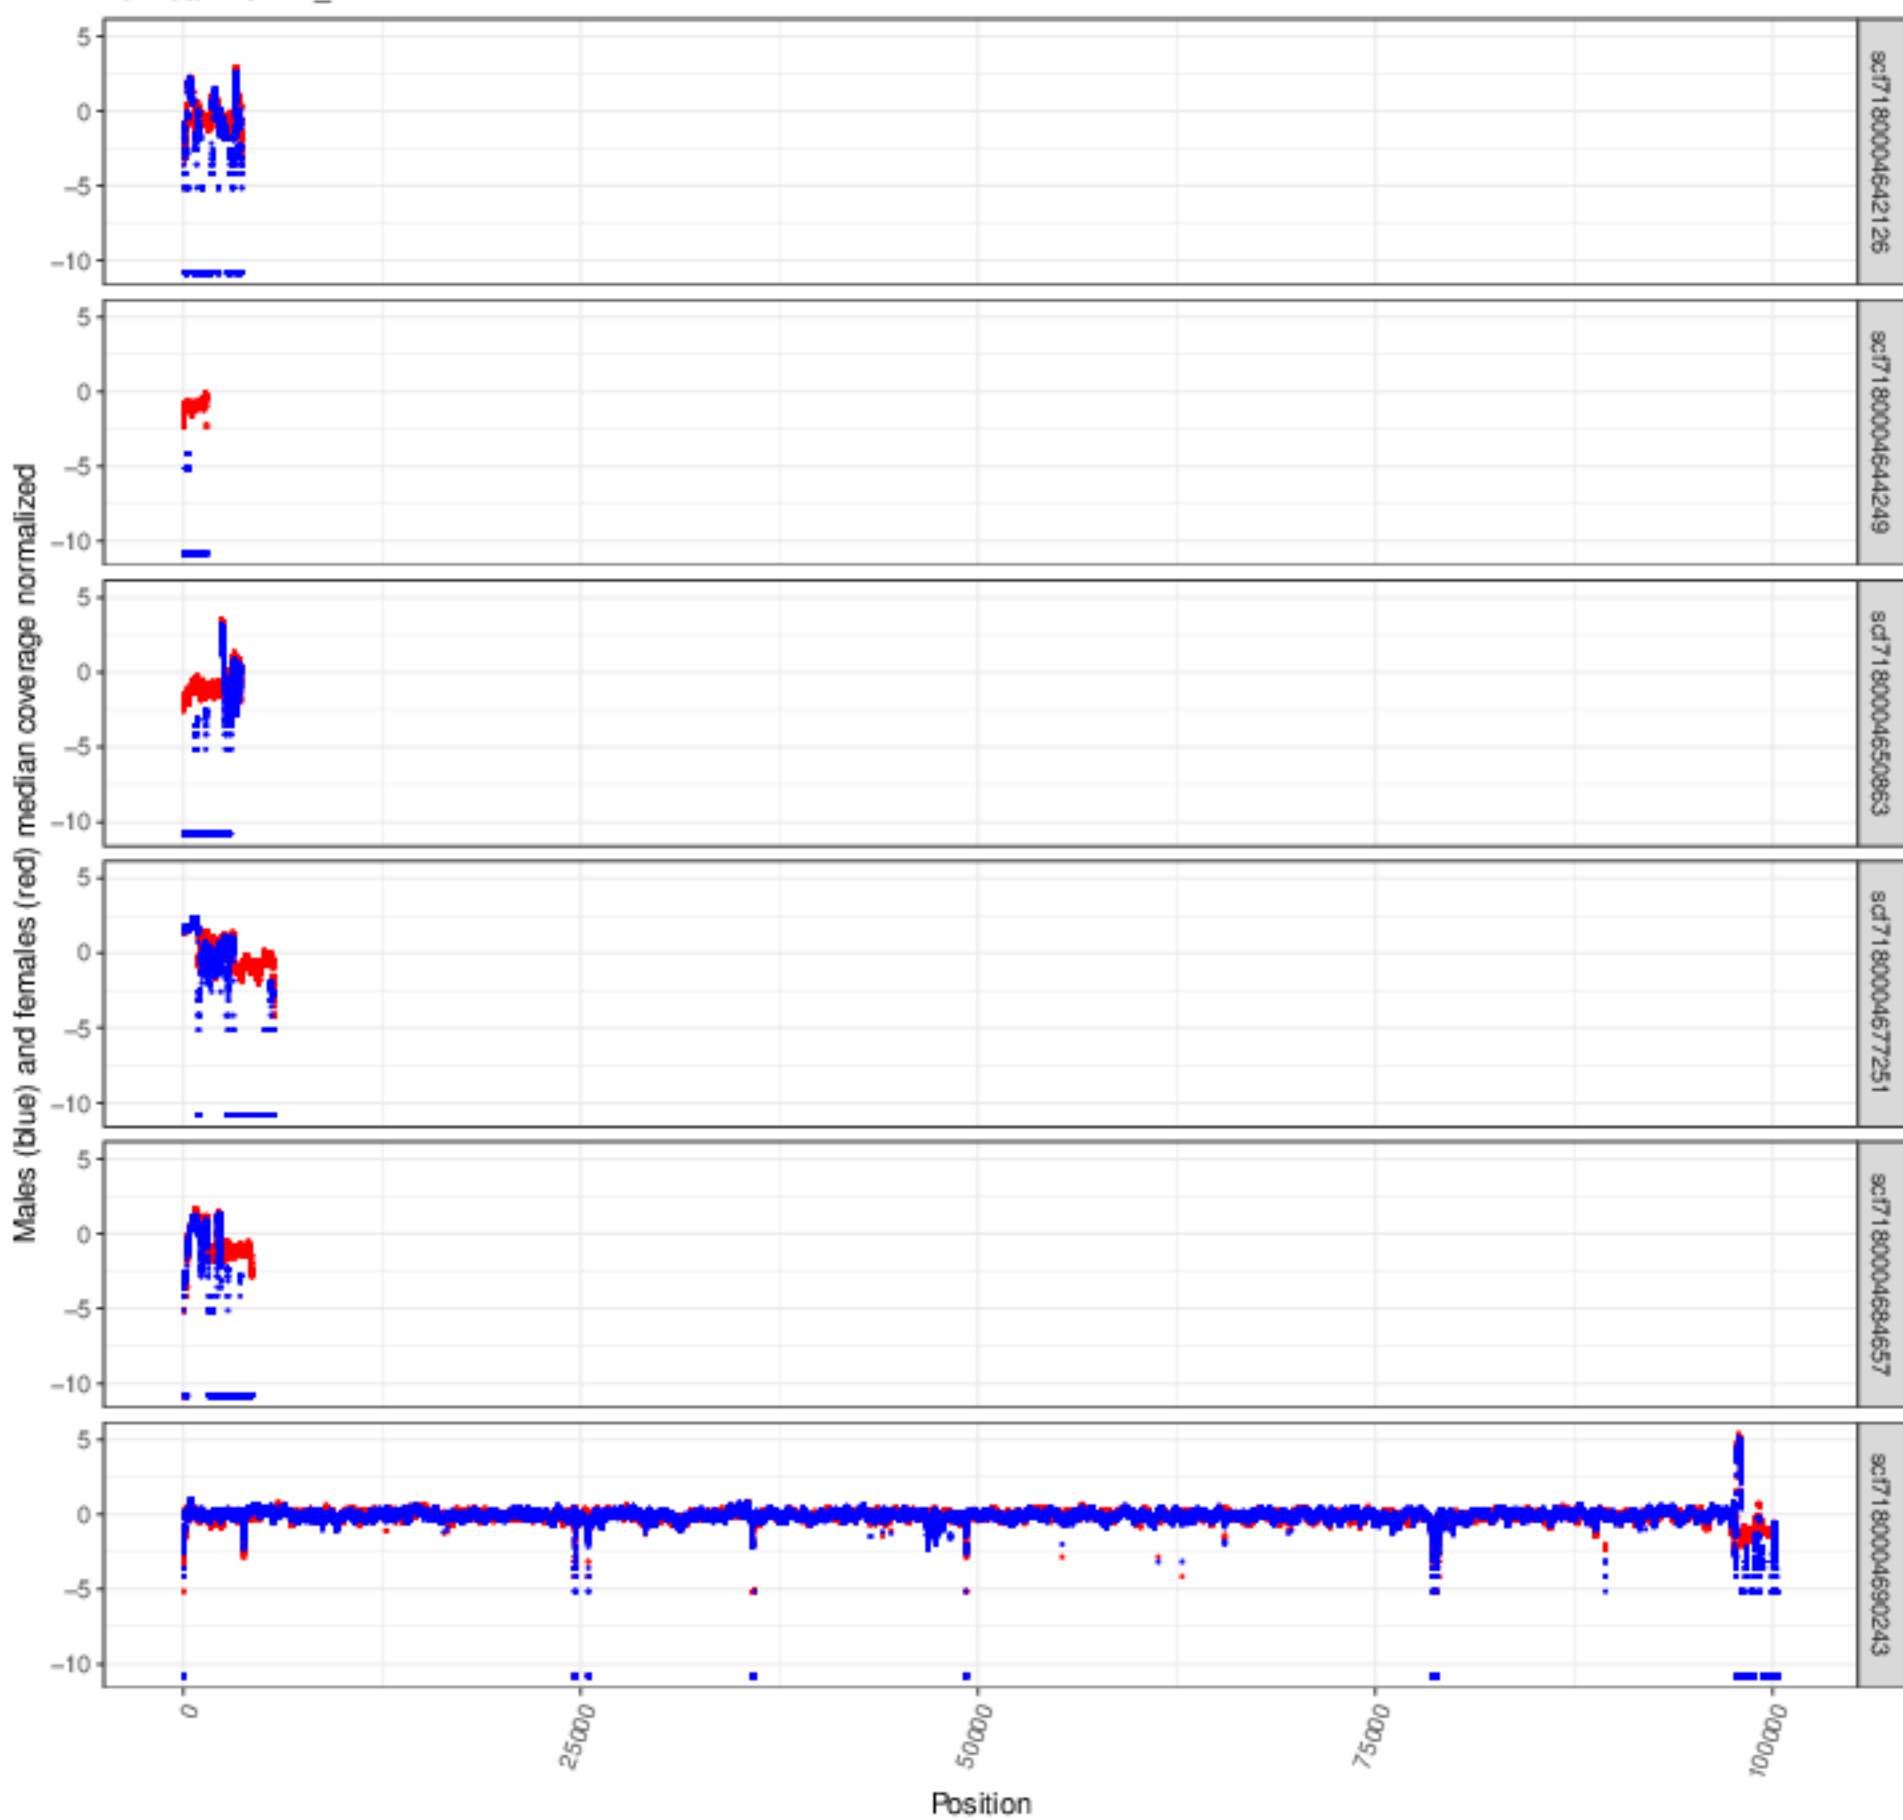

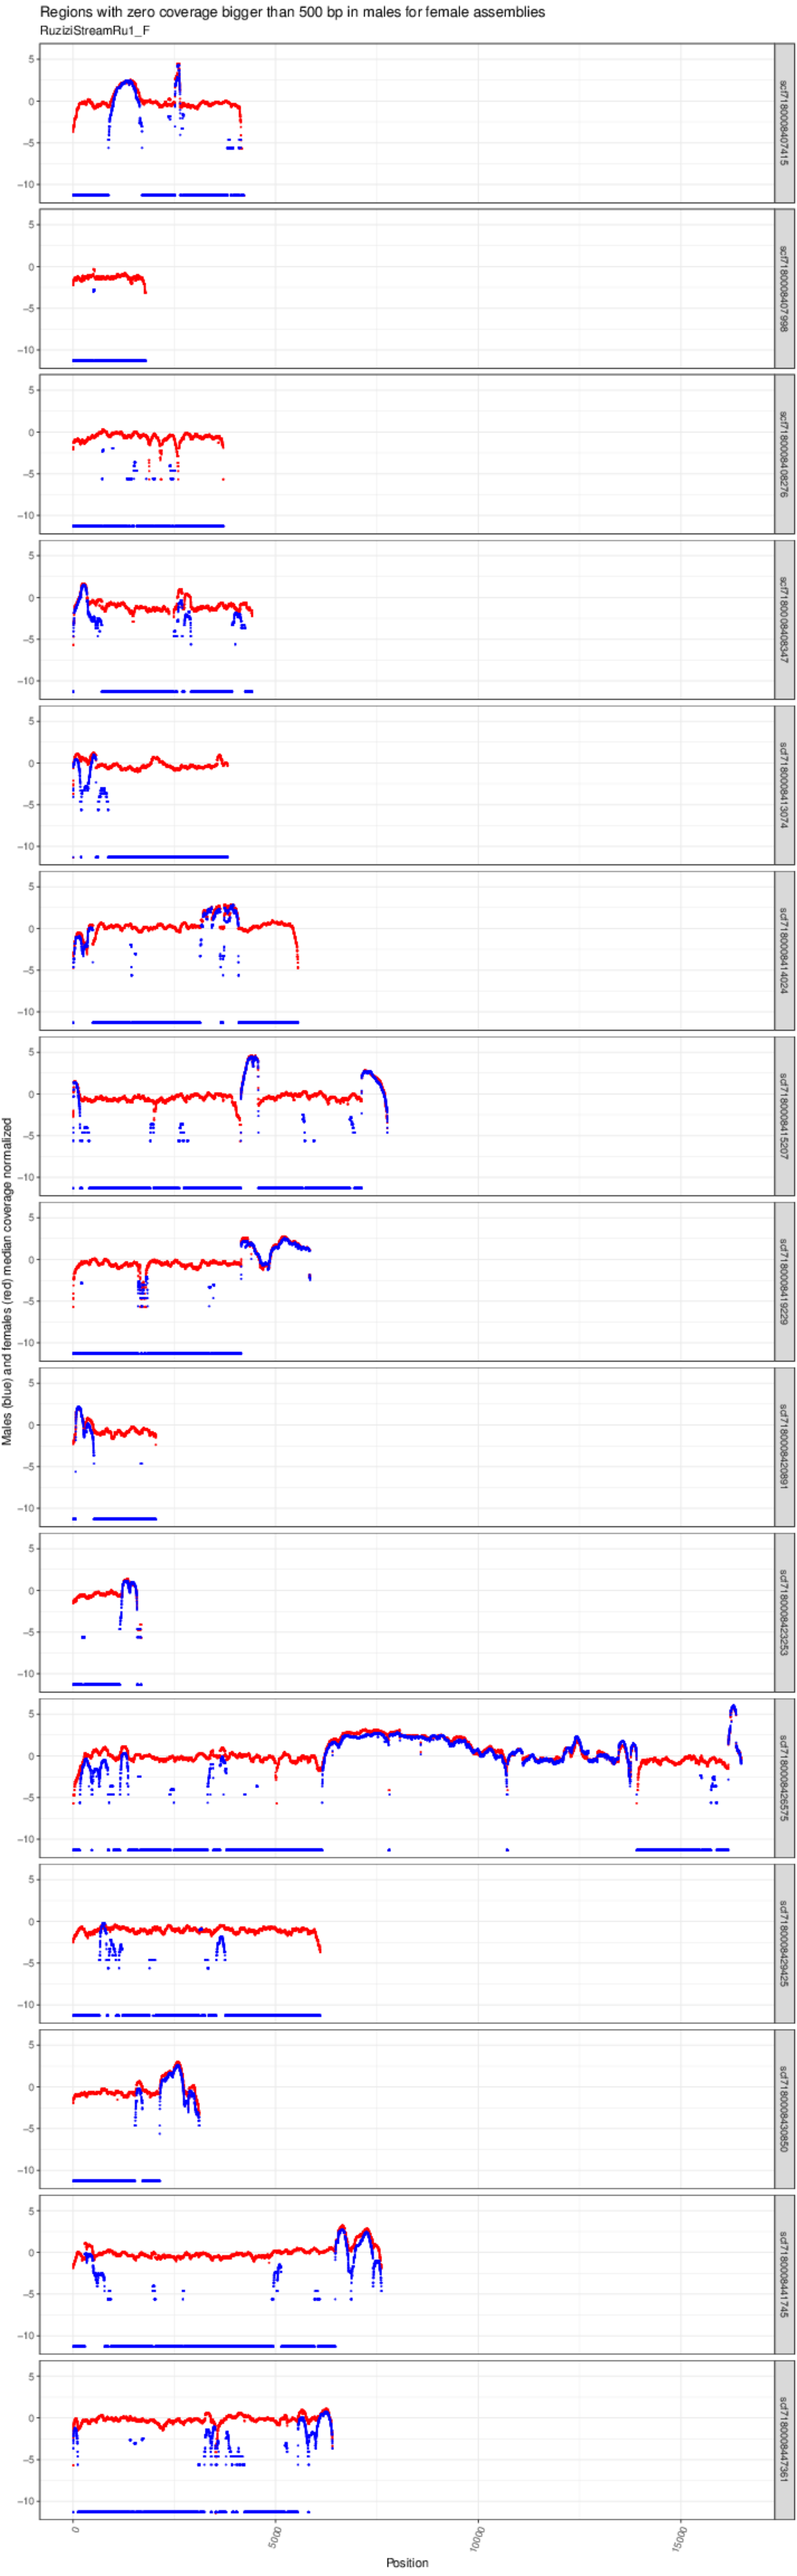

Supplement: Supplementary file 5 [file 1]
