# Supplementary material
Source: publisher figshare collection journal article supplement (https://gsajournals.figshare.com/articles/dataset/_/21623121)

Regions with zero coverage bigger than 500 bp in females for male assemblies

ChitiliRiverCh1\_M

Males (blue) and females (red) median coverage normalized

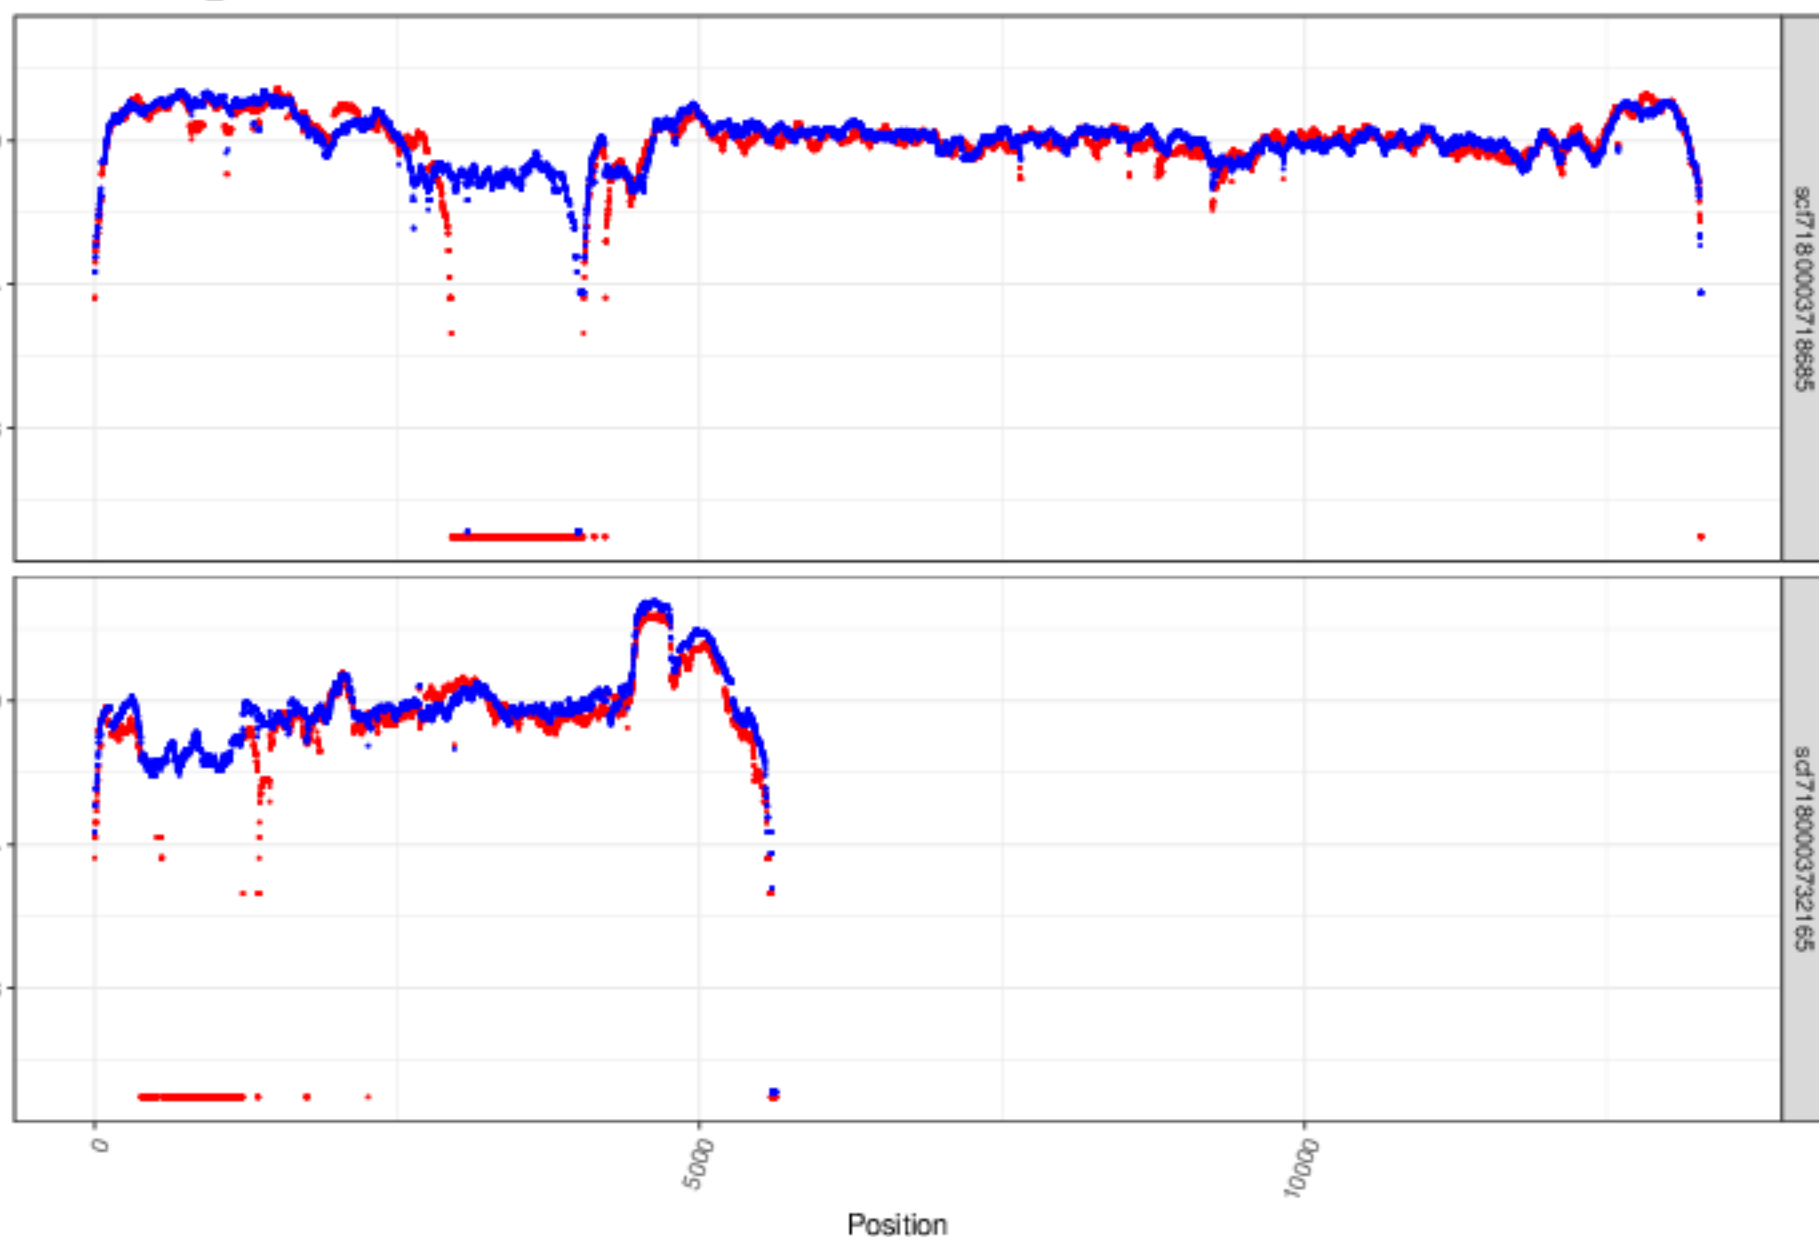

Regions with zero coverage bigger than 500 bp in females for male assemblies

KalamboRiverKa1\_M

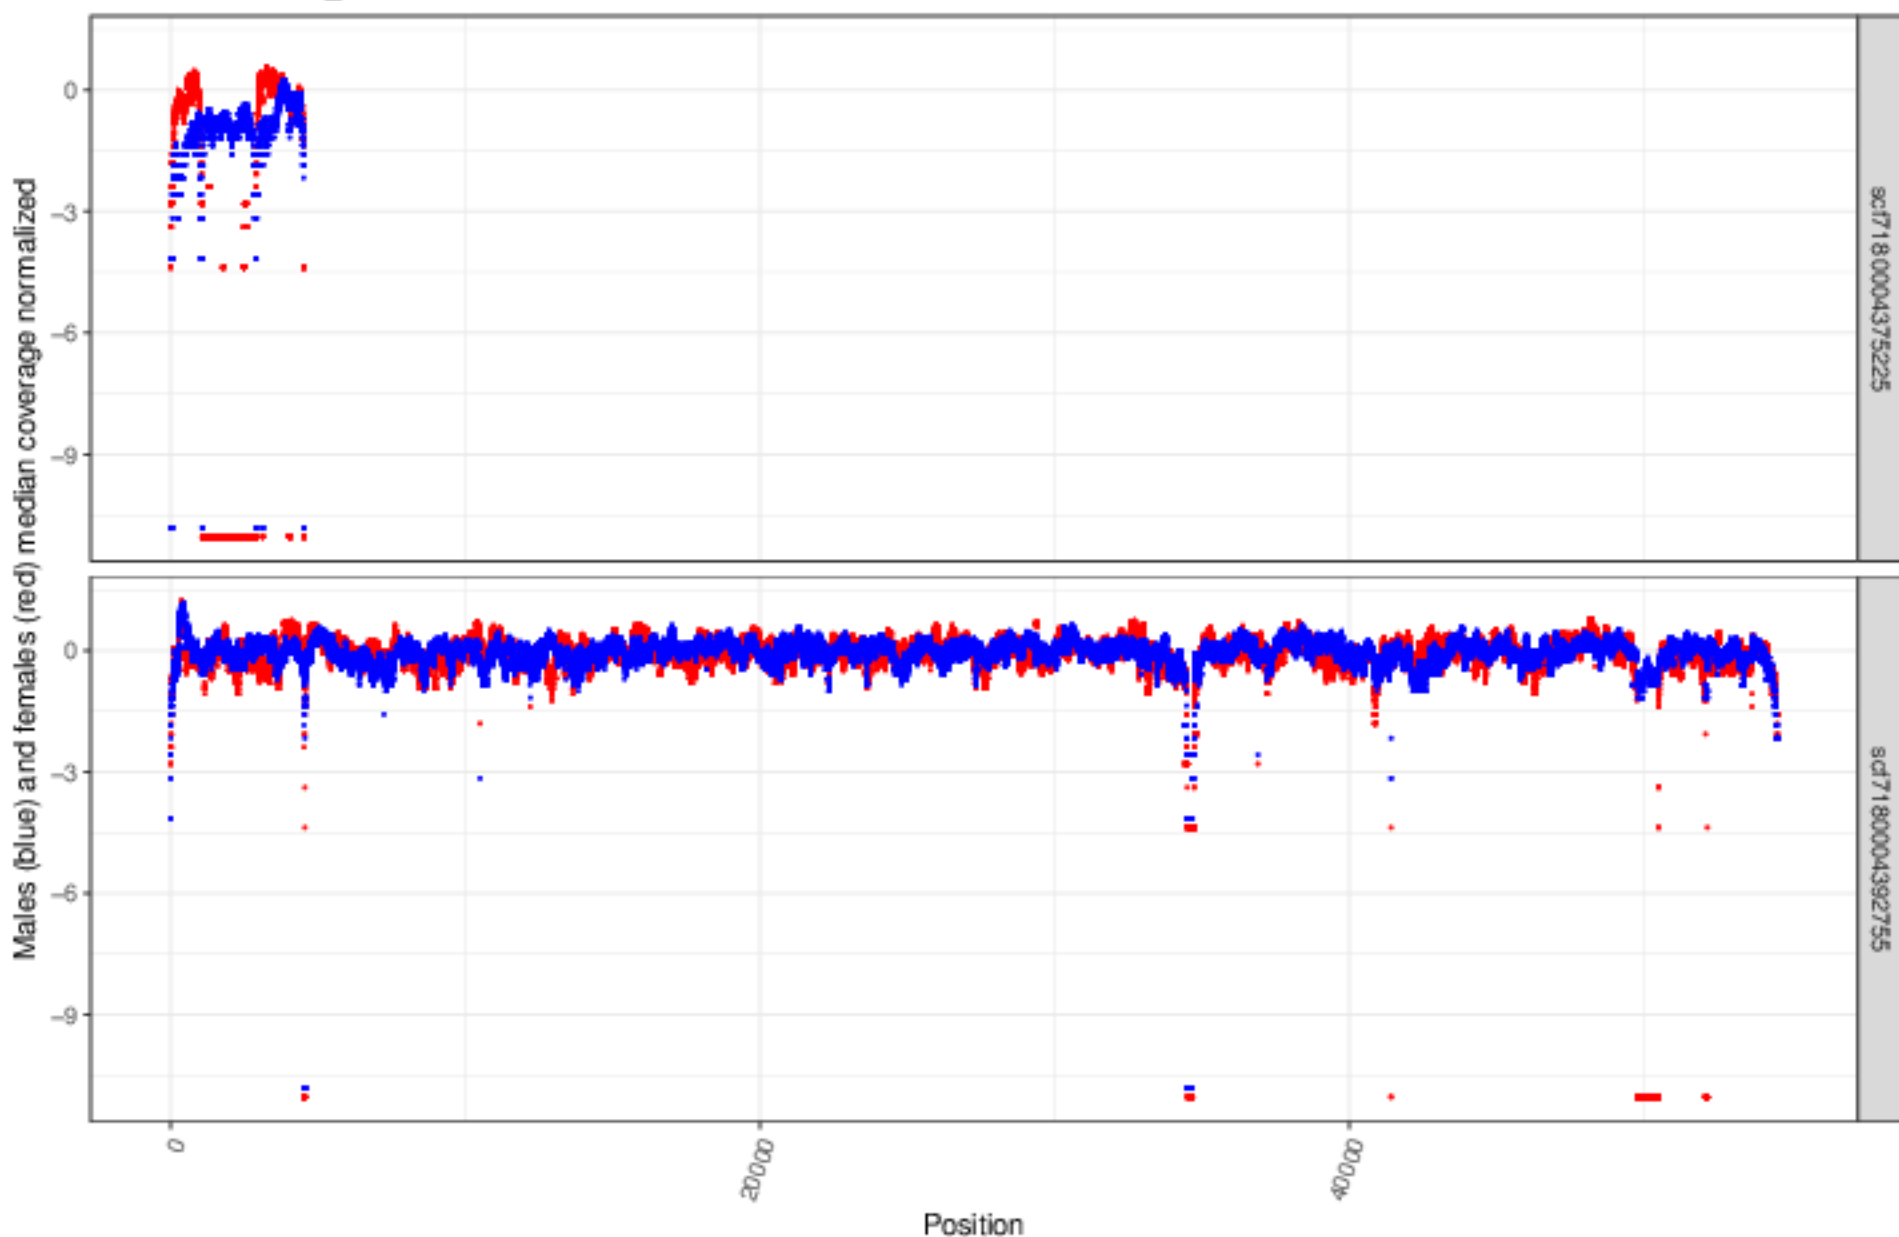

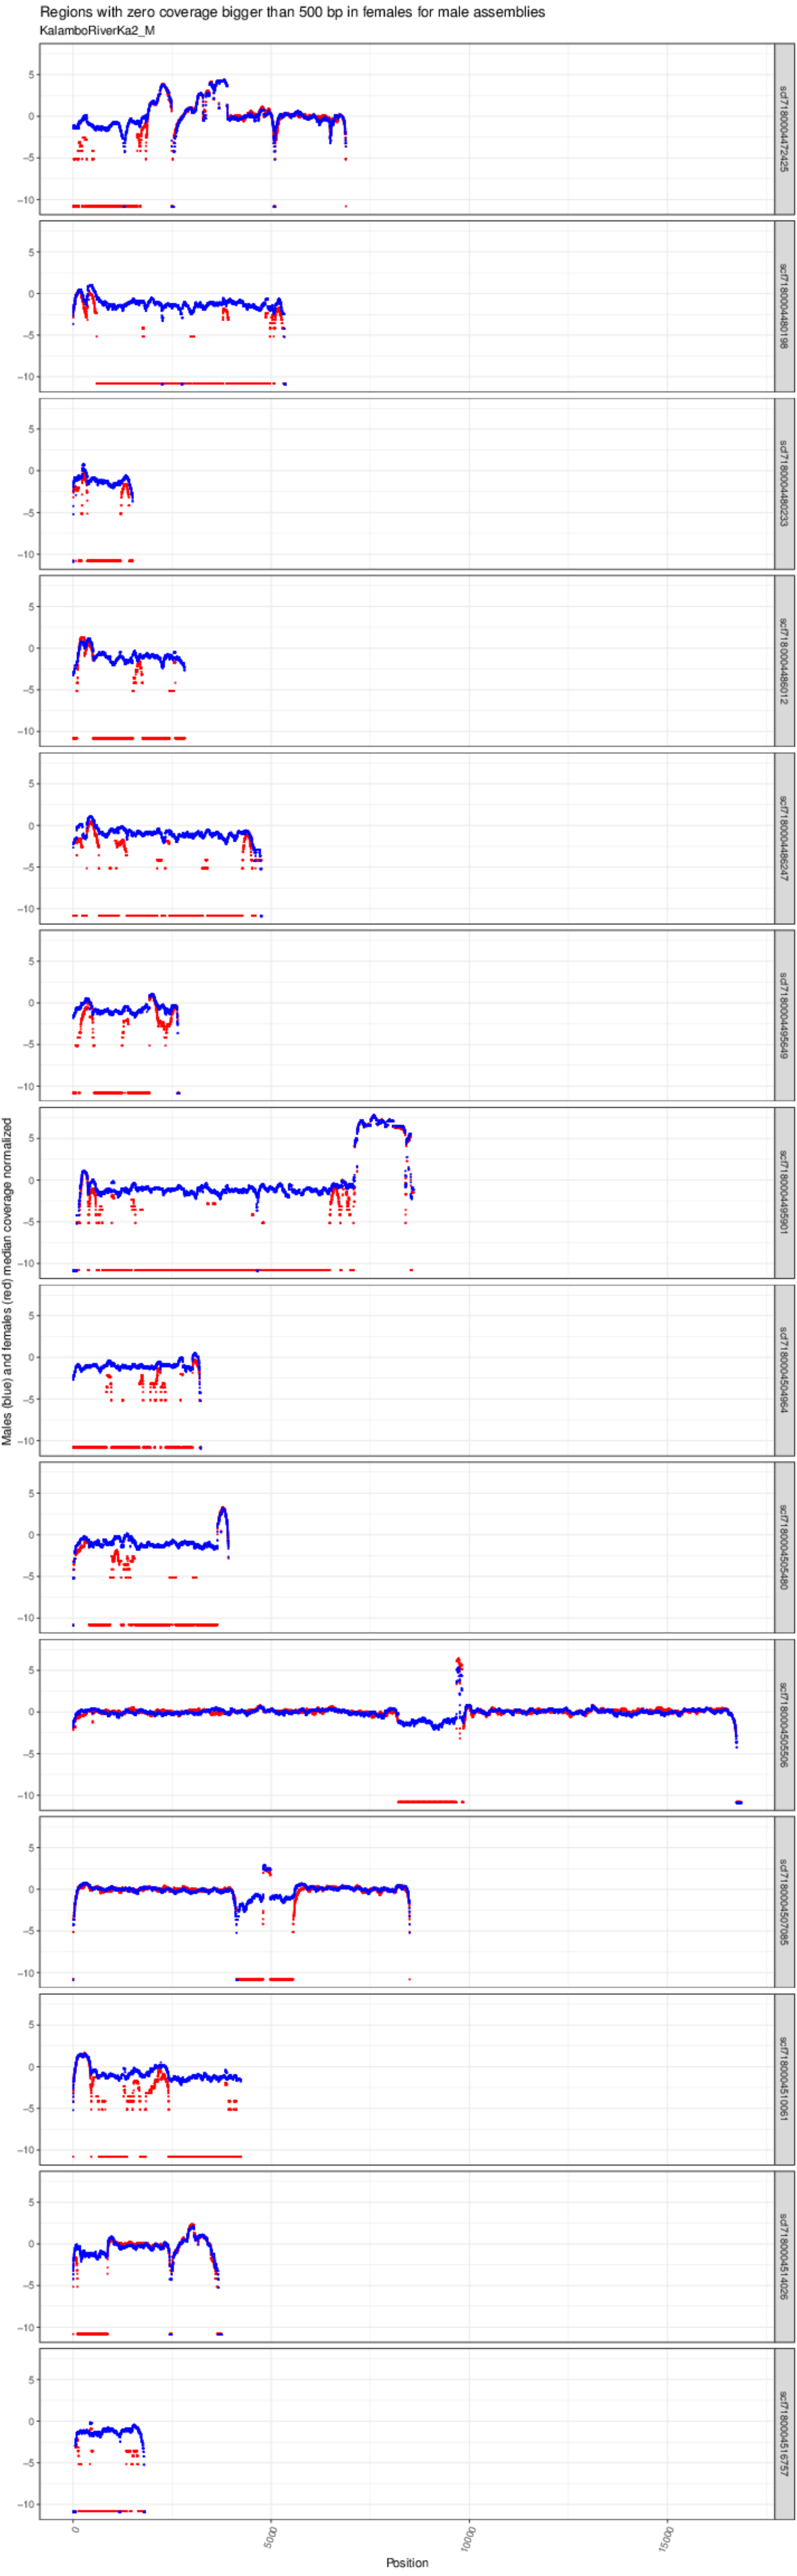

Regions with zero coverage bigger than 500 bp in females for male assemblies

LufubuLakeLfl\_M

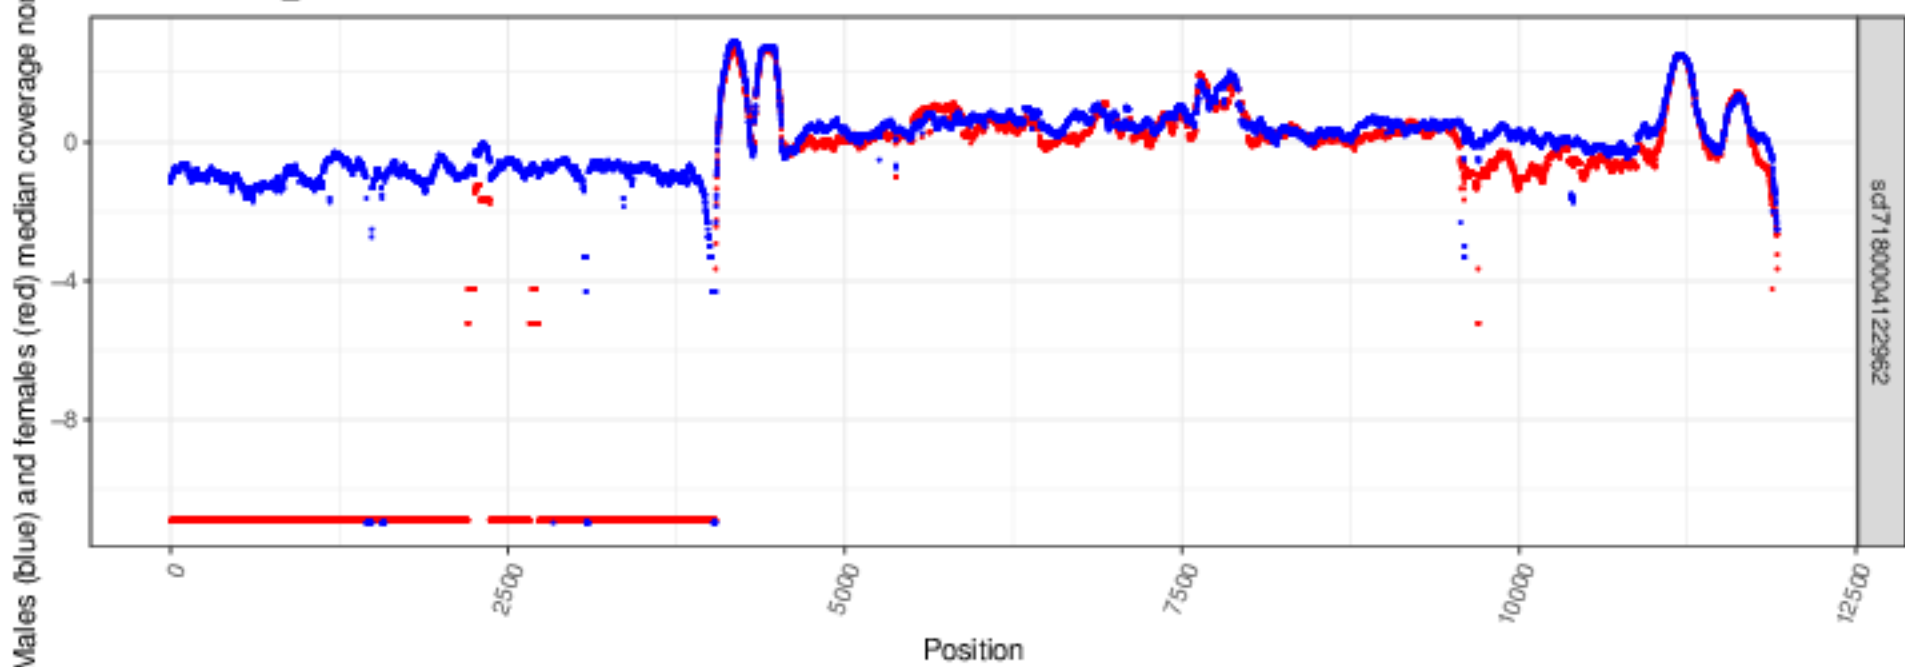

Regions with zero coverage bigger than 500 bp in females for male assemblies

LufubuRiverLf2\_M

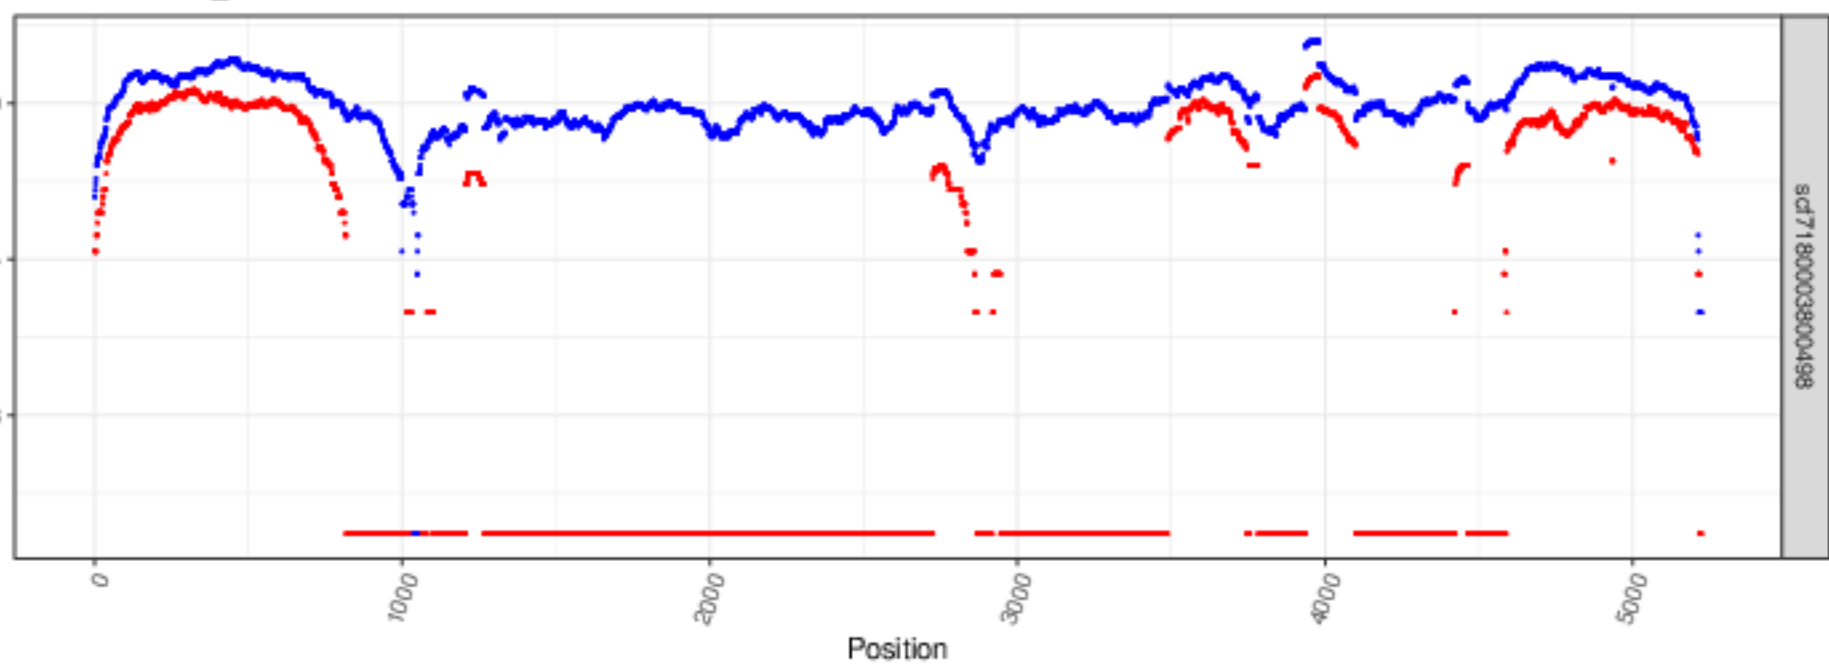

Regions with zero coverage bigger than 500 bp in females for male assemblies

LunzuaLakeLzL\_M

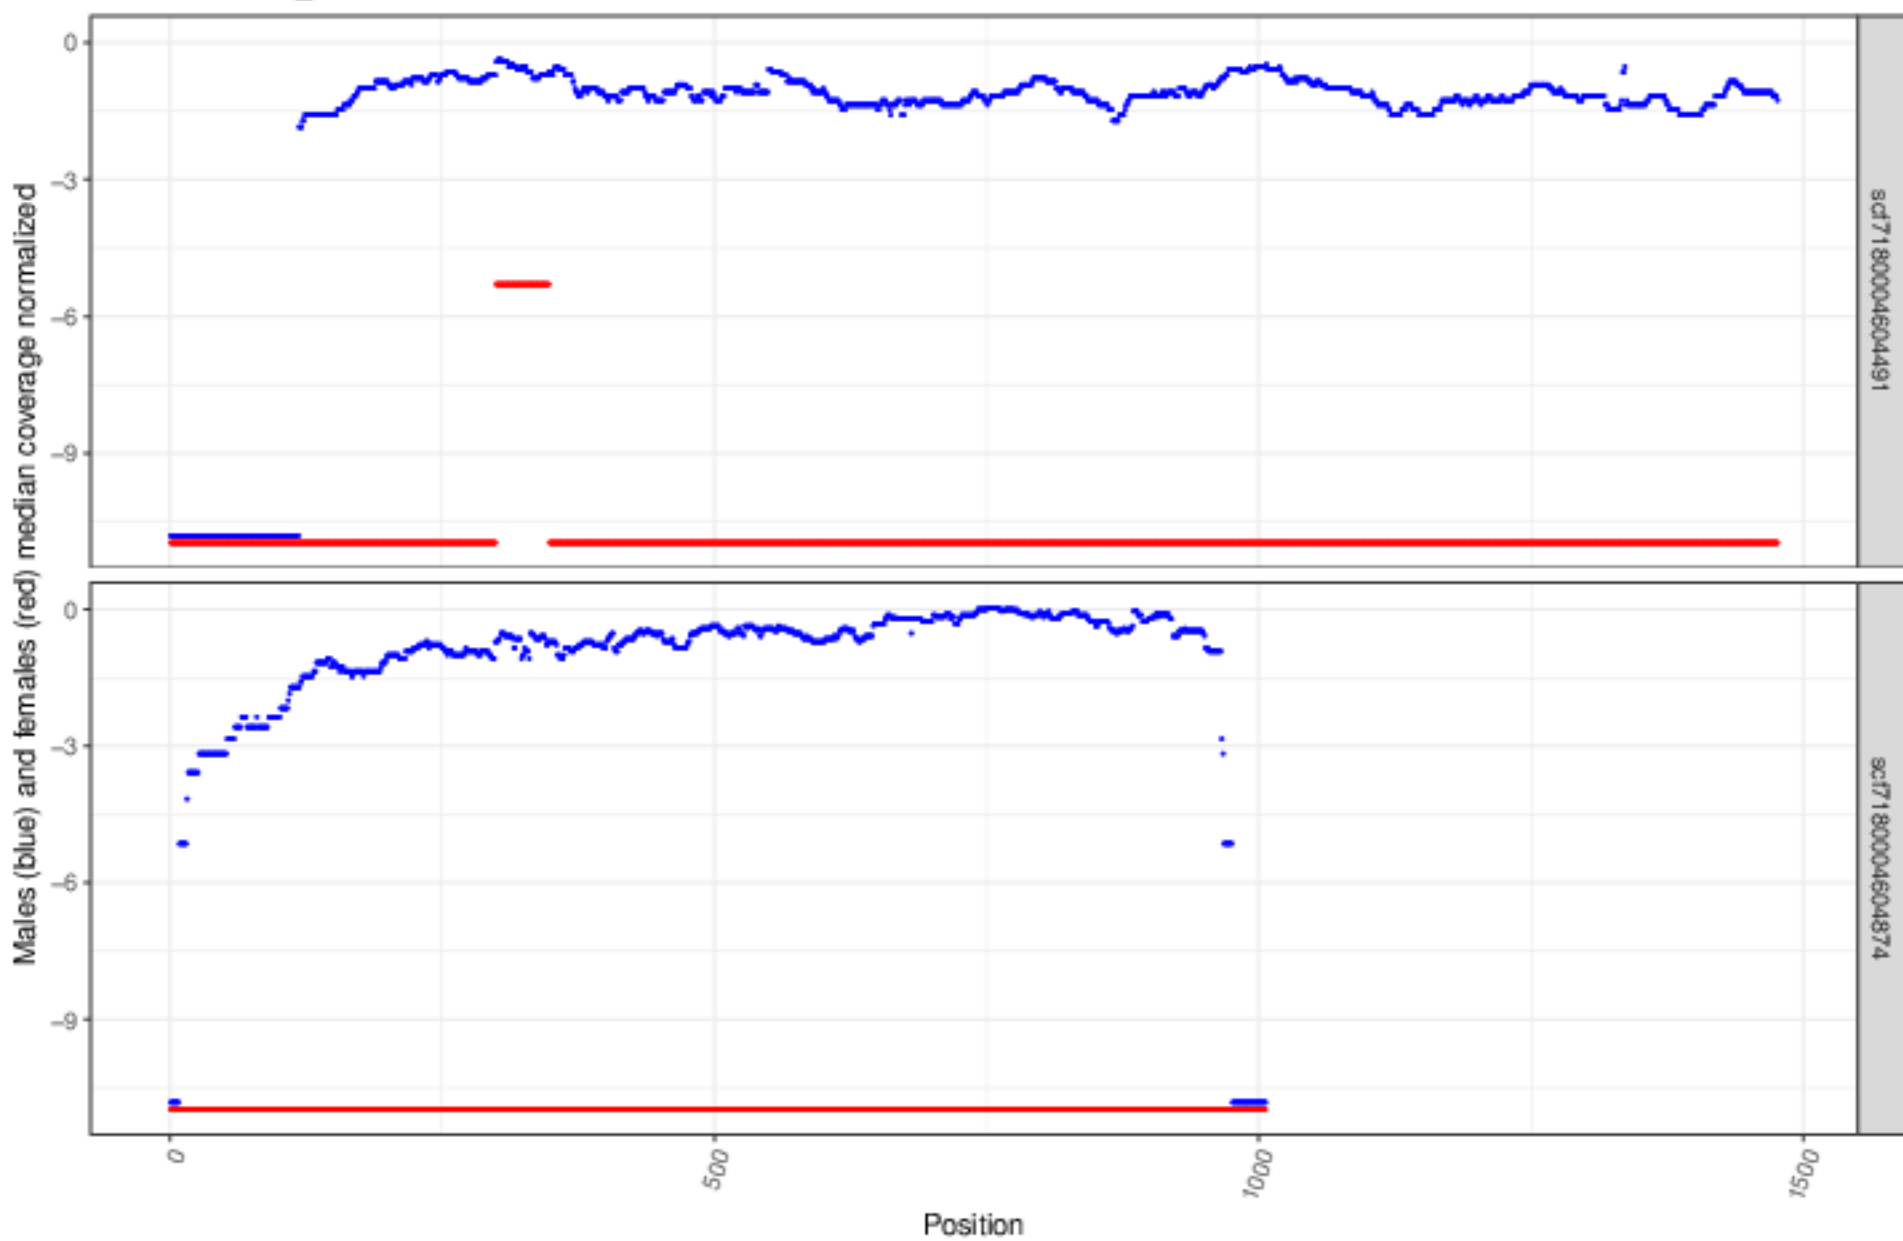

Regions with zero coverage bigger than 500 bp in females for male assemblies

LunzuaRiverLz1\_M

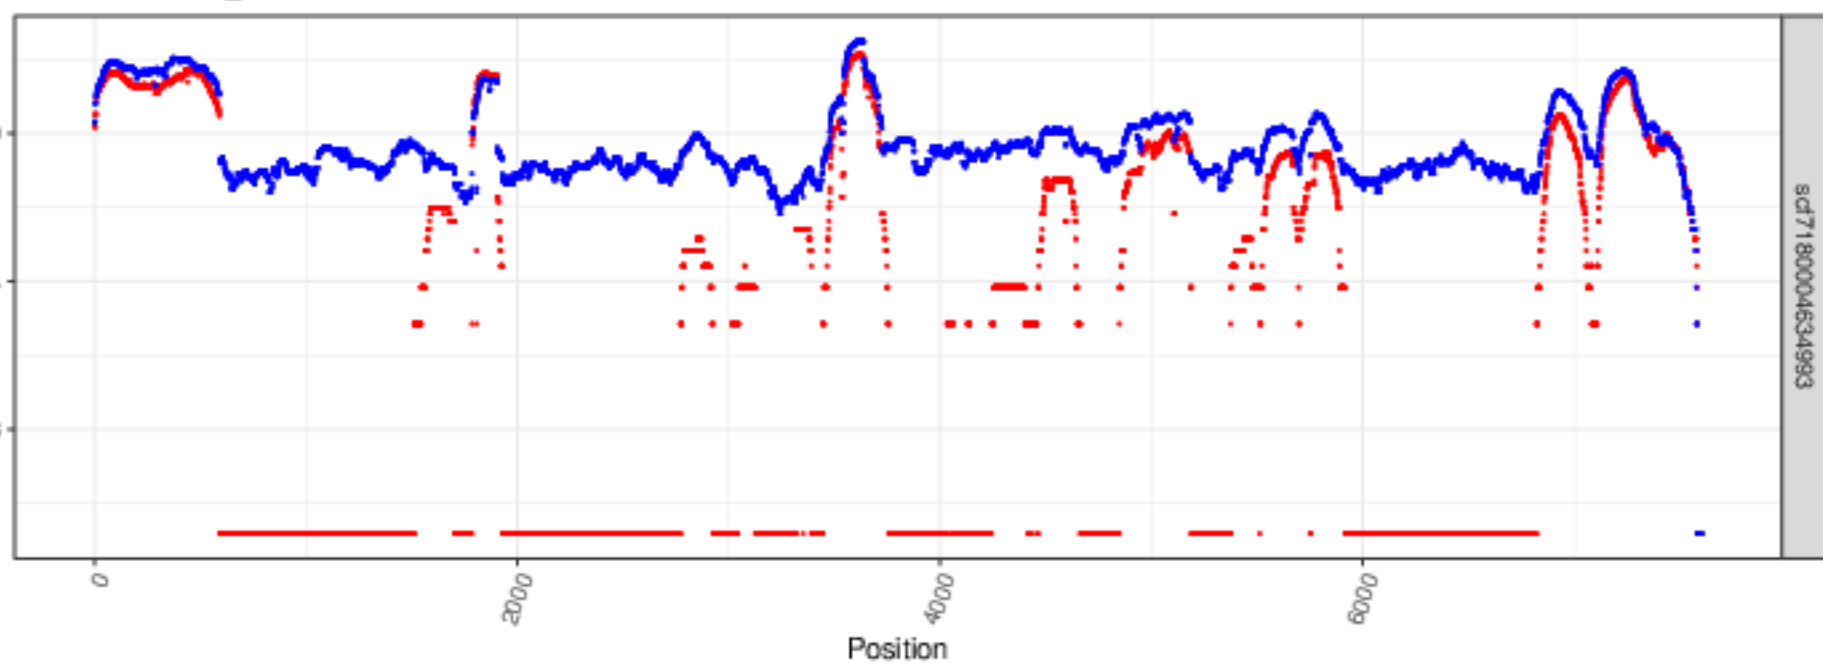

Regions with zero coverage bigger than 500 bp in females for male assemblies

RuziziLakeRuL\_M

Males (blue) and females (red) median coverage normalized

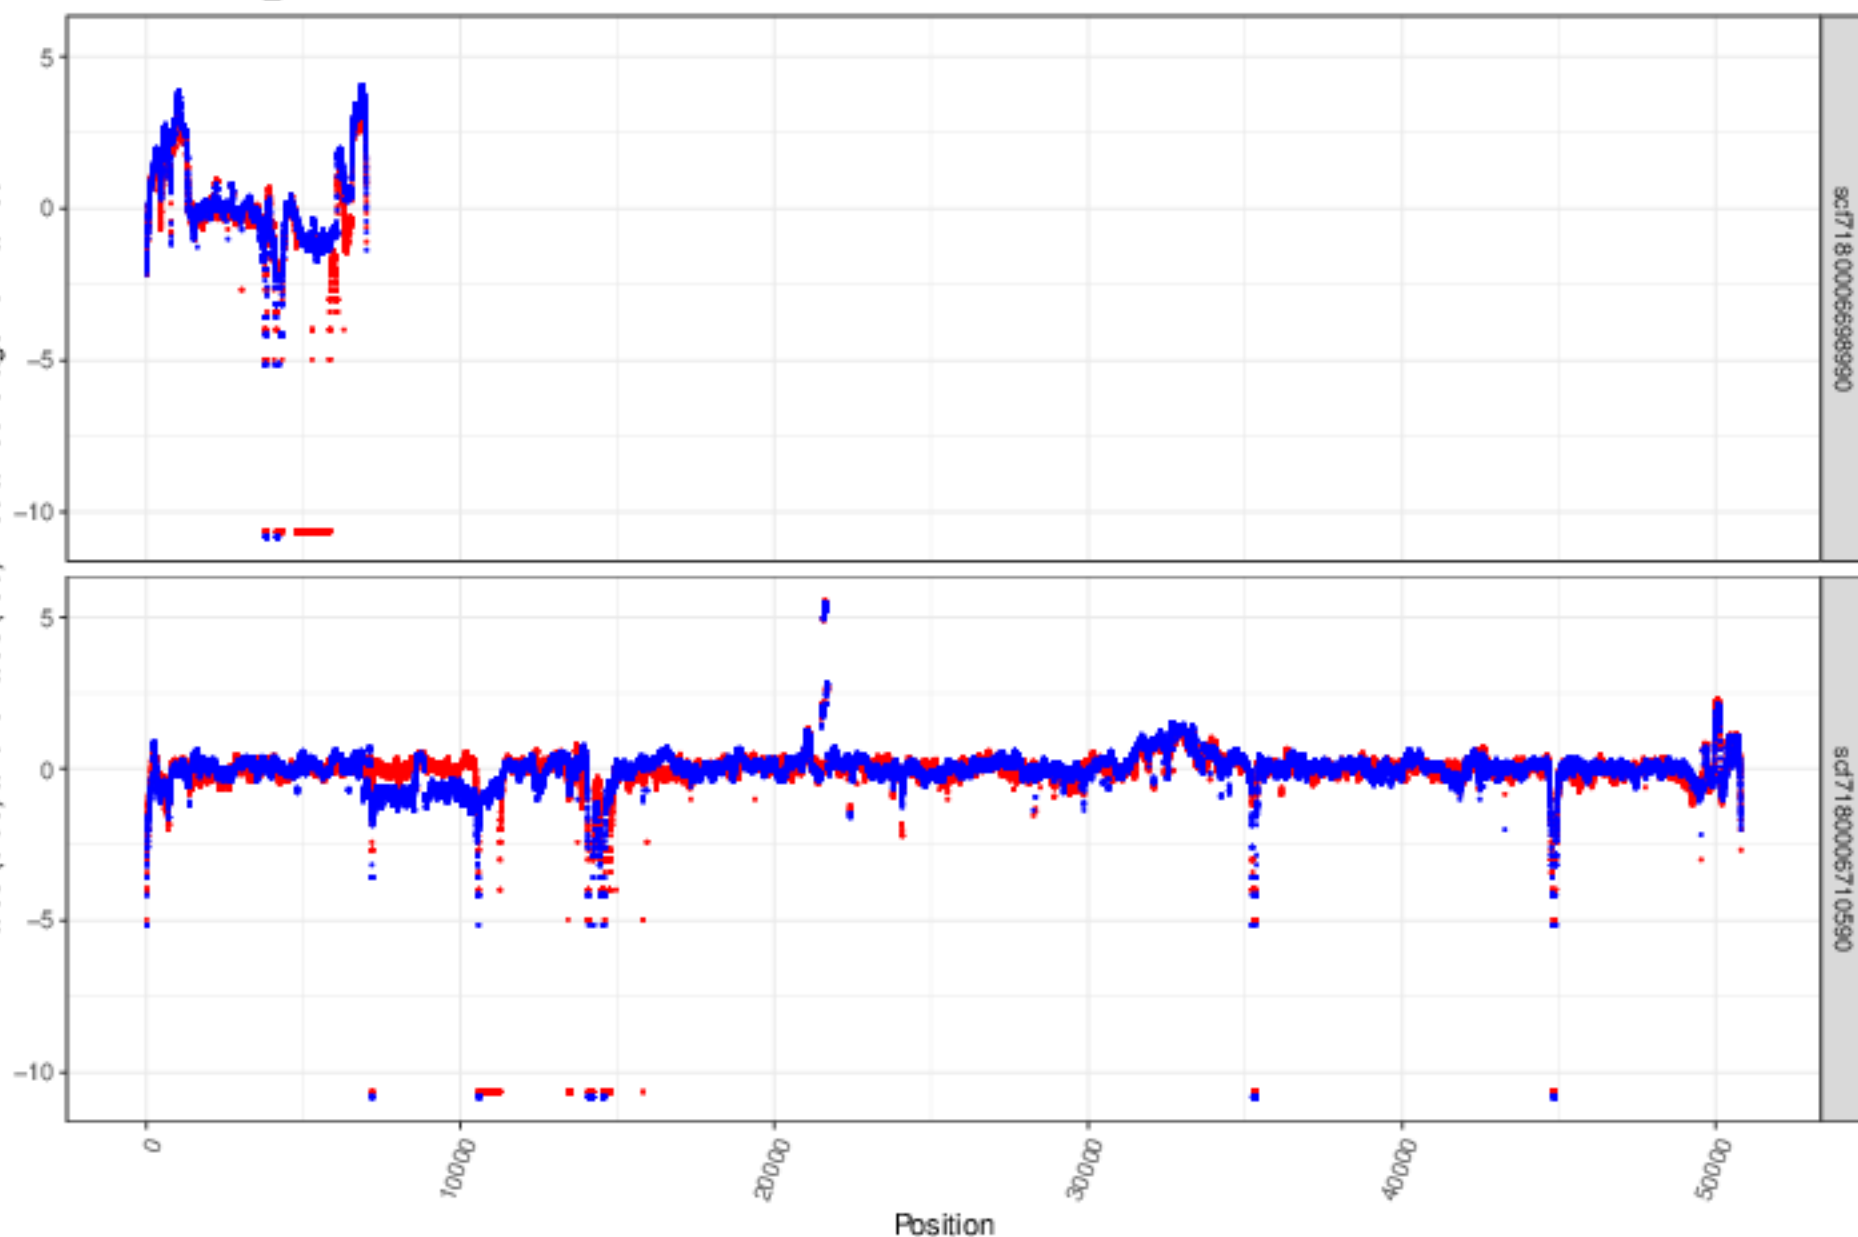



Regions with zero coverage bigger than 500 bp in females for male assemblies  
RuziziStreamRu1\_M

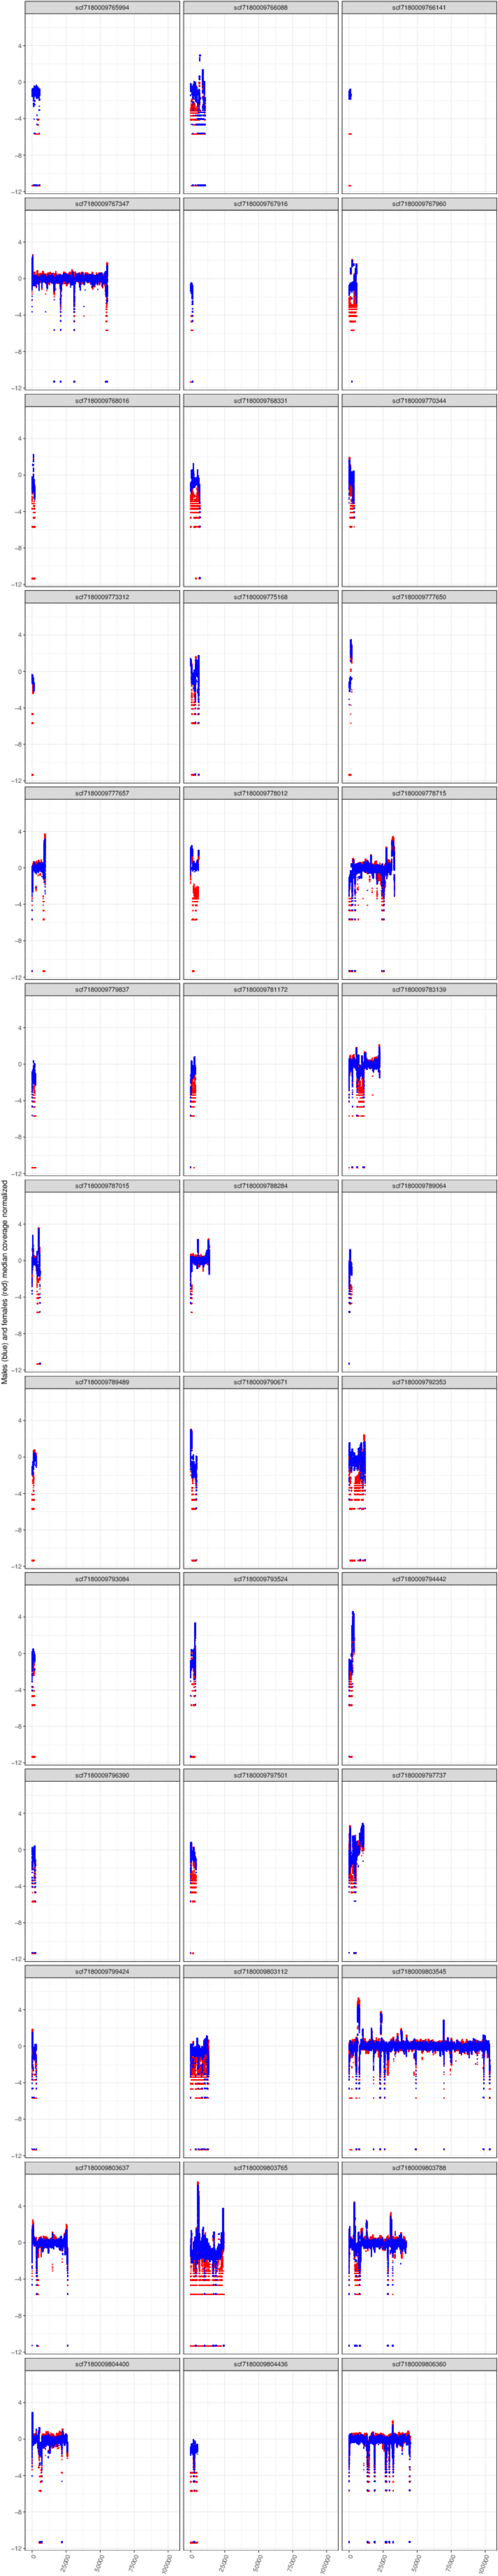

Supplement: Supplementary file 8 [file 1]
