# Supplementary material
Source: publisher figshare collection journal article supplement (https://gsajournals.figshare.com/articles/dataset/_/21623121)

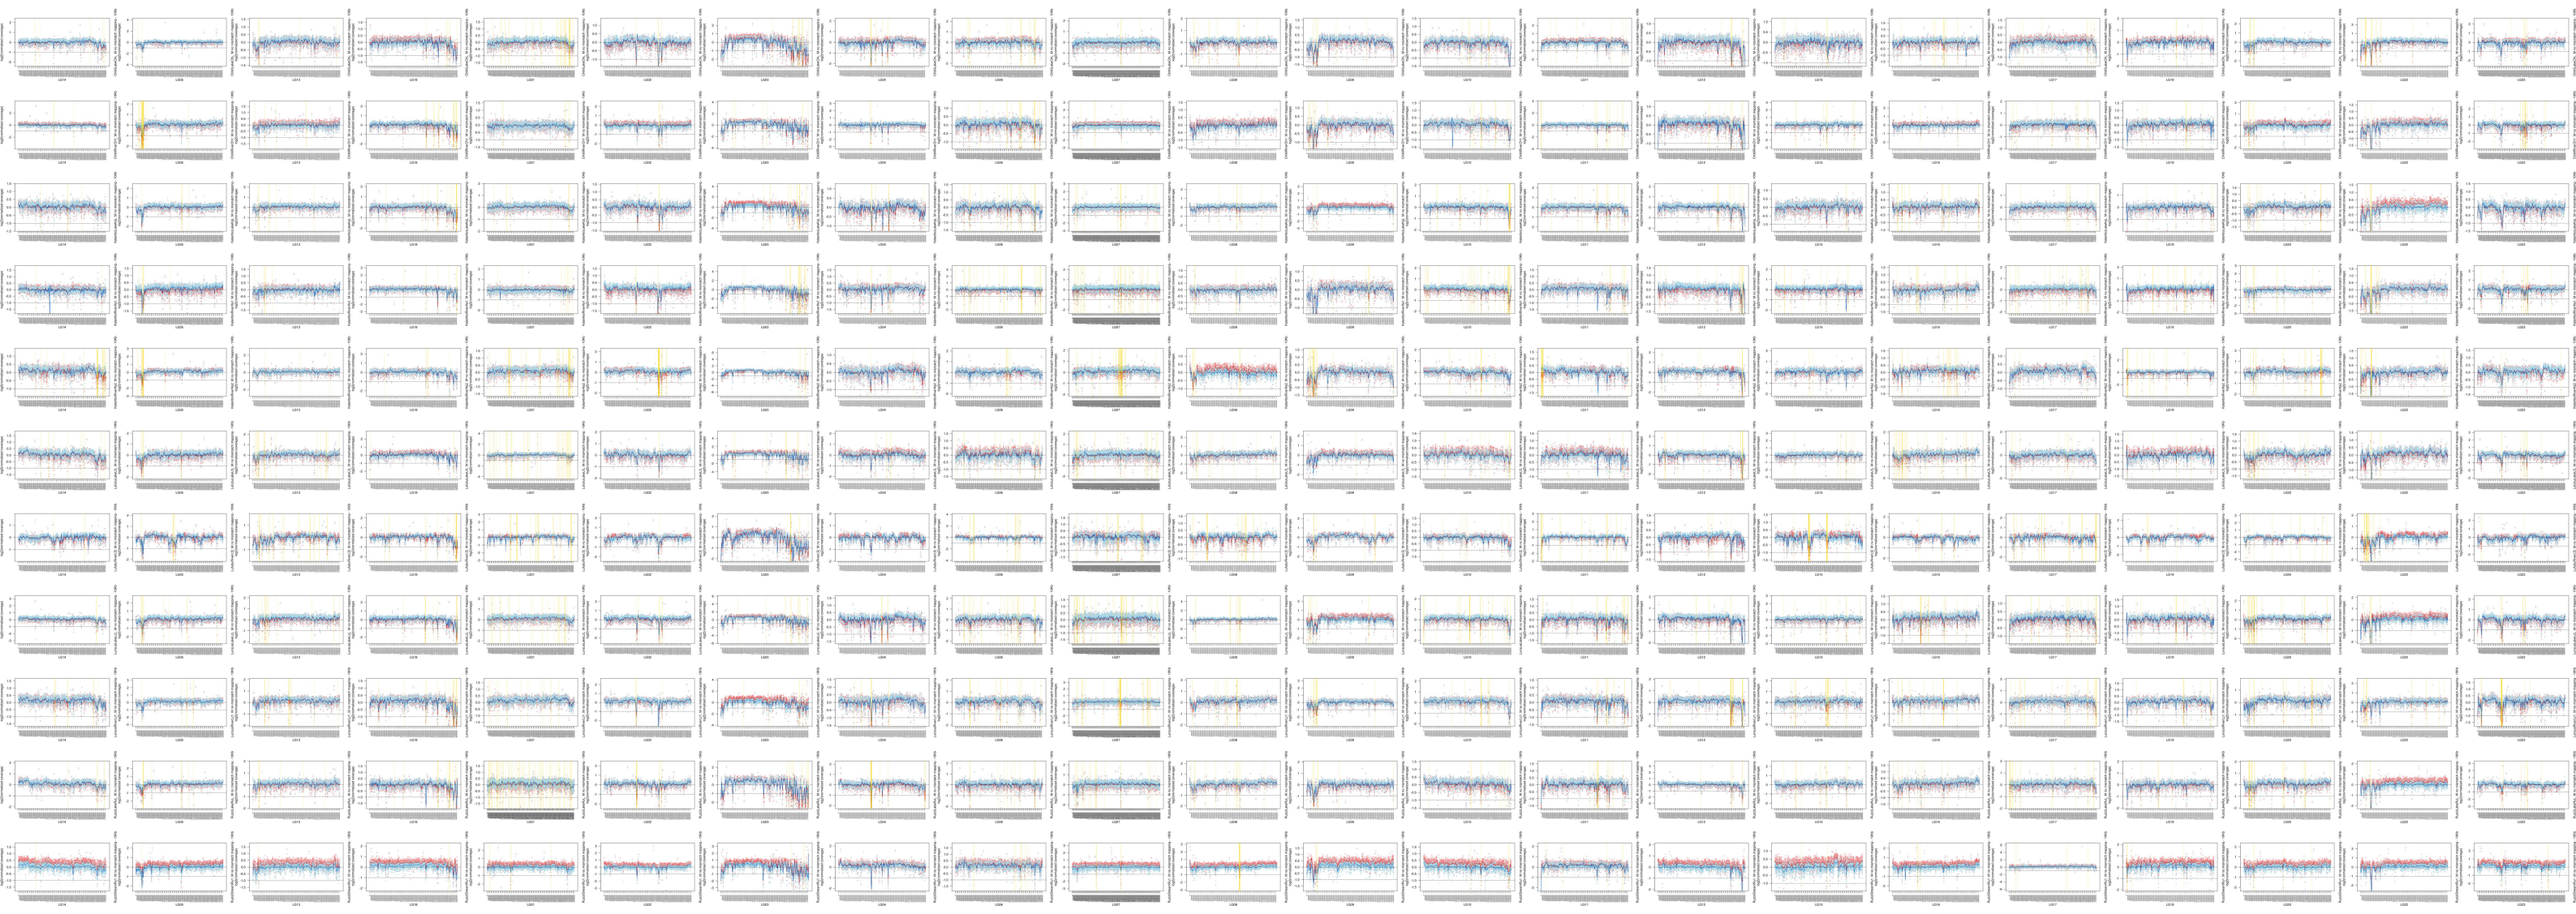

Supplement: Supplementary file 2 [file 1]

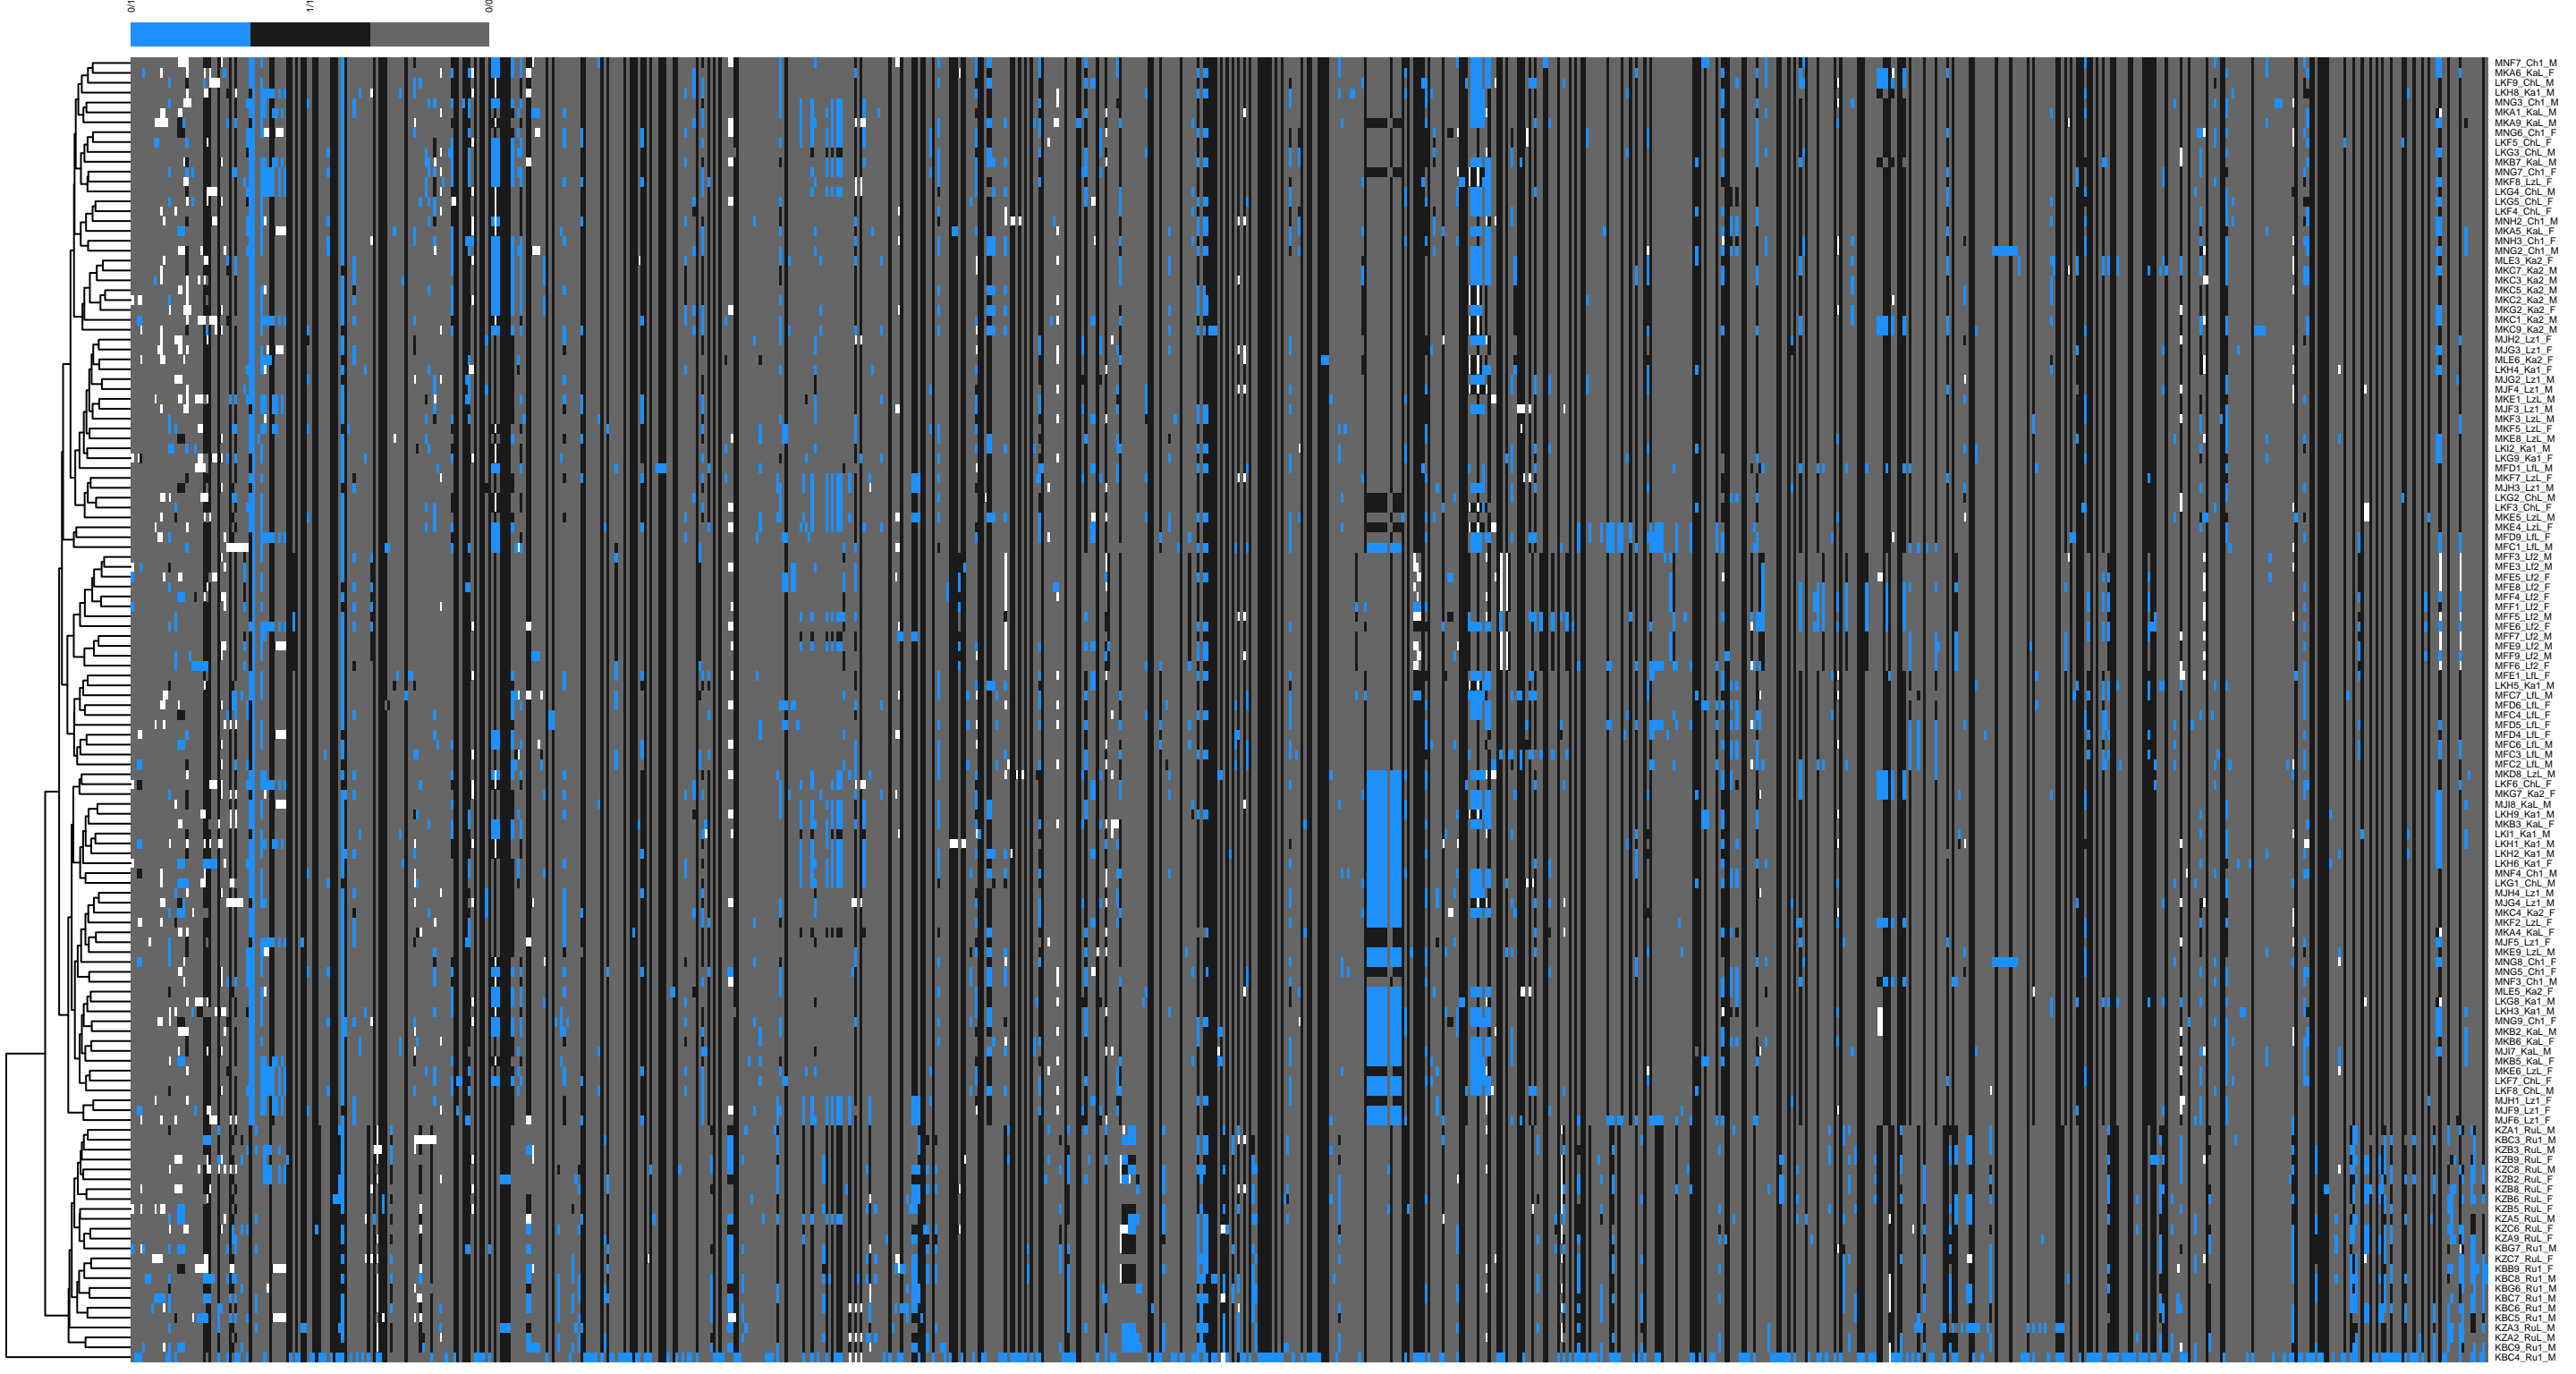

Supplement: Supplementary file 4 [file 1]

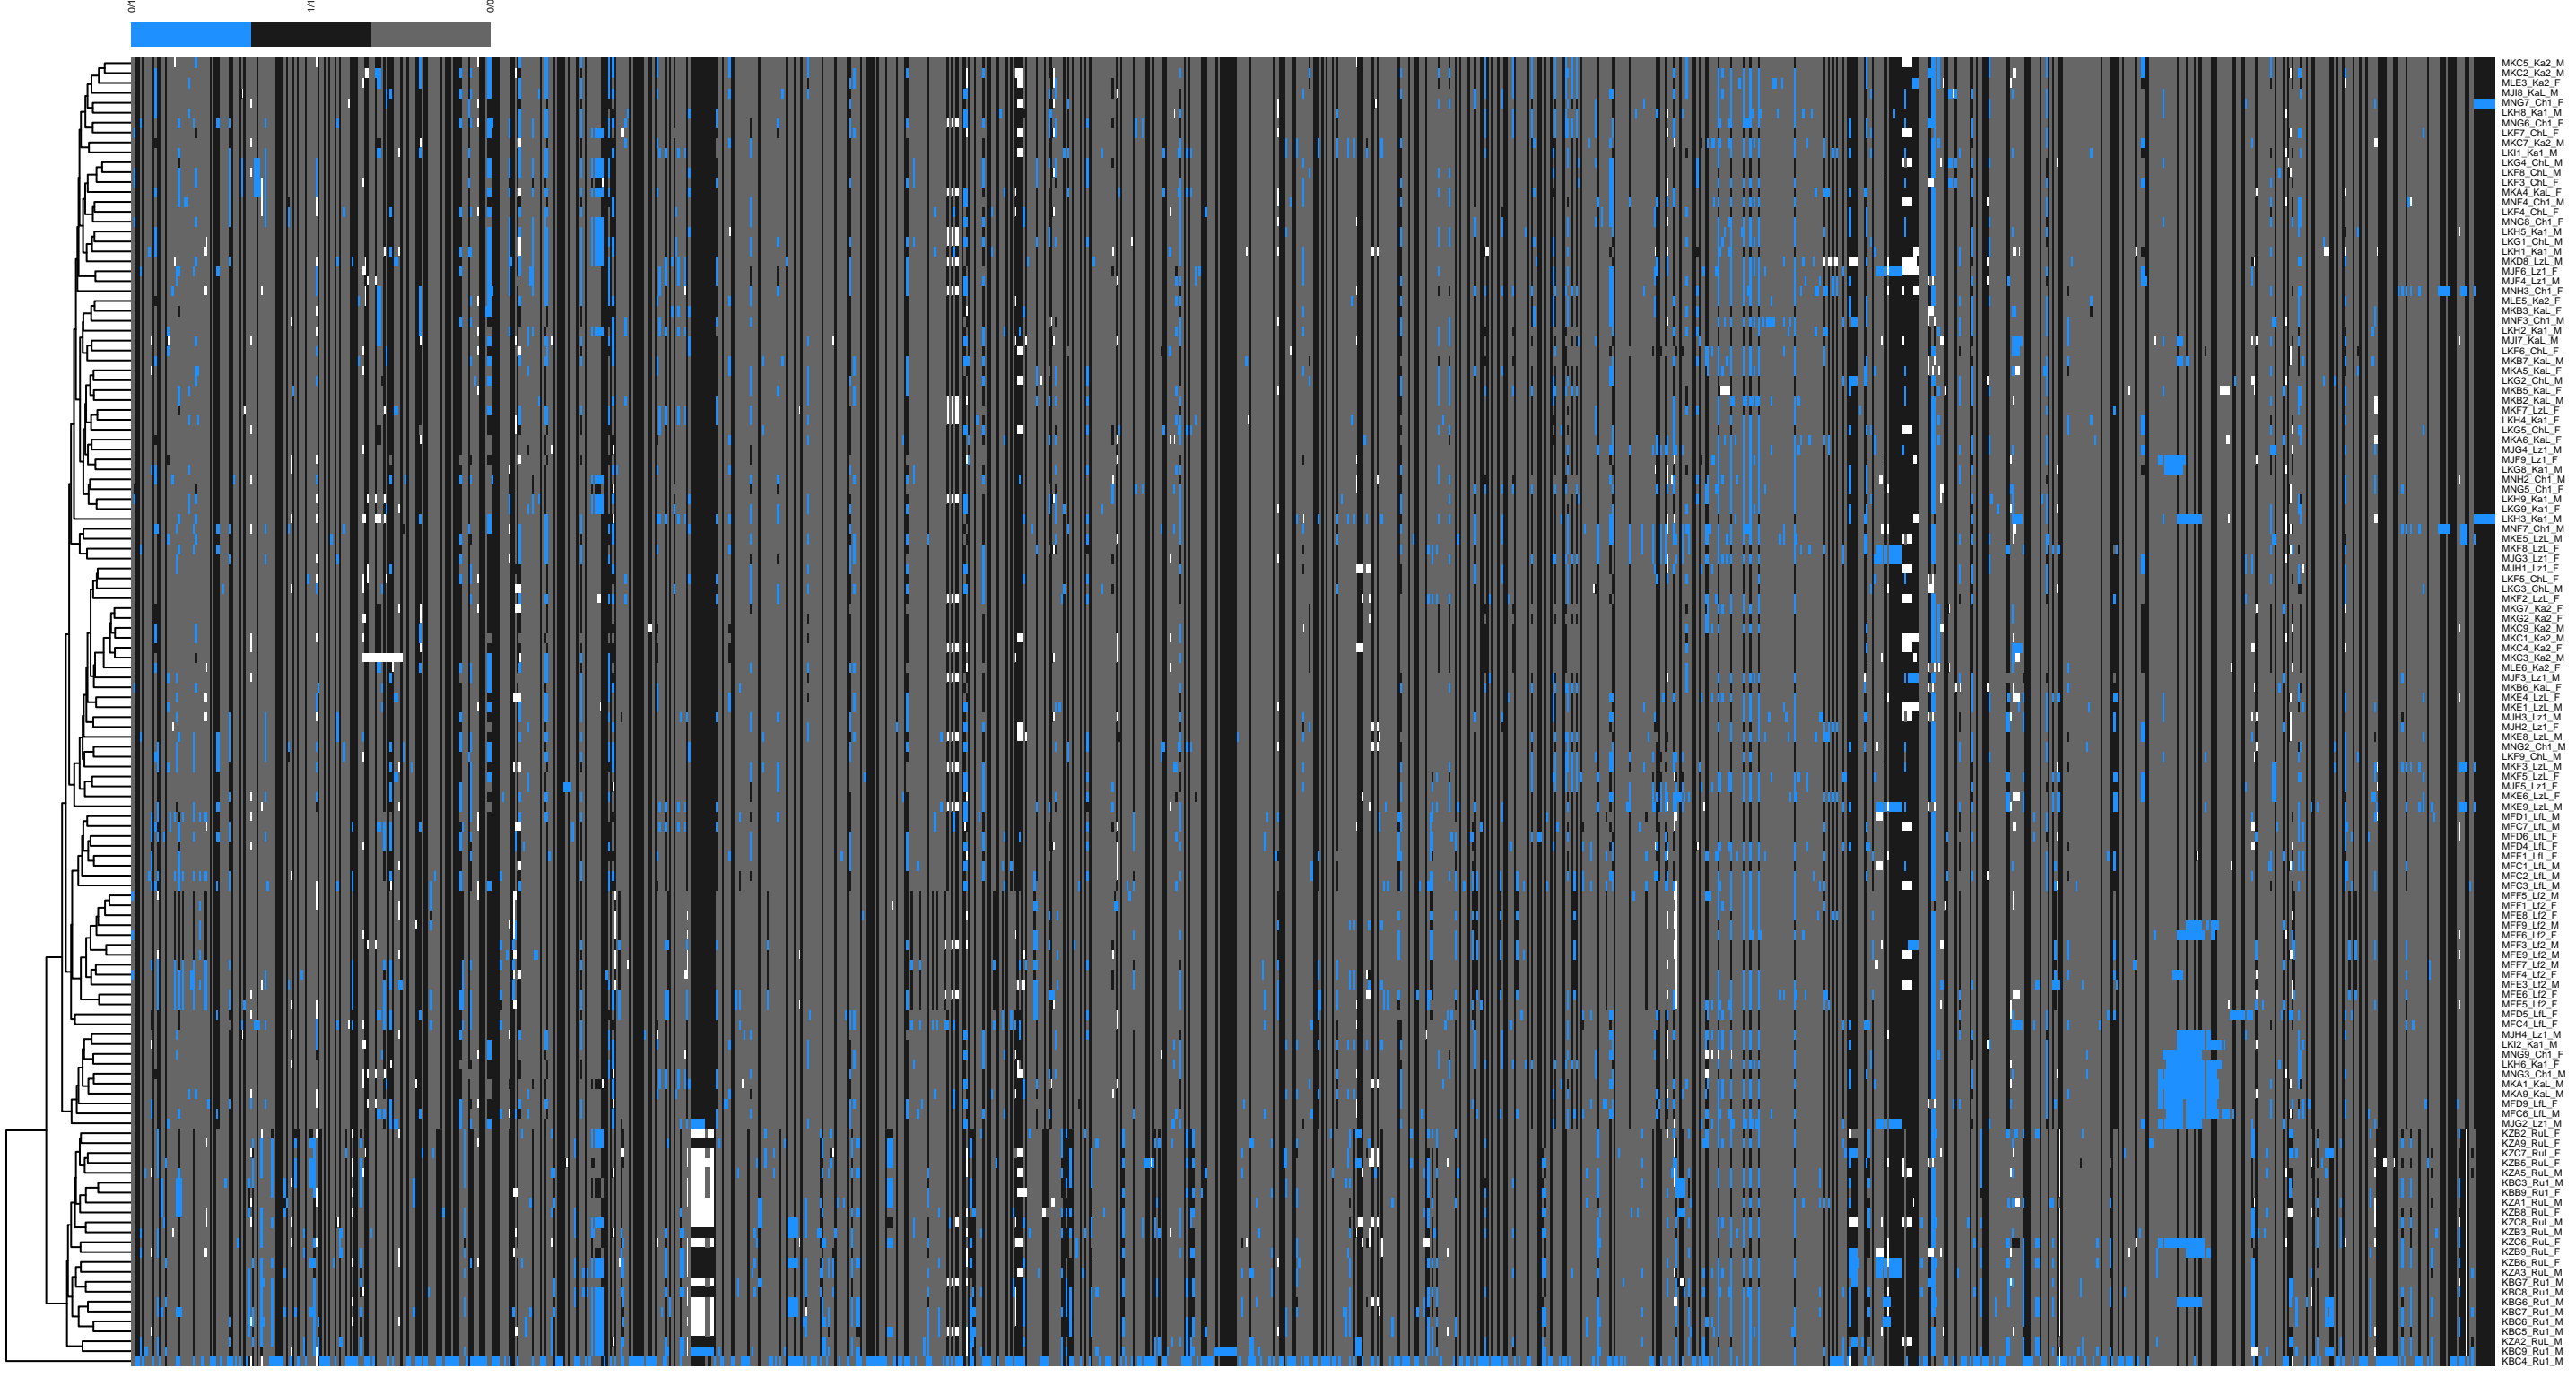

Supplement: Supplementary file 6 [file 1]

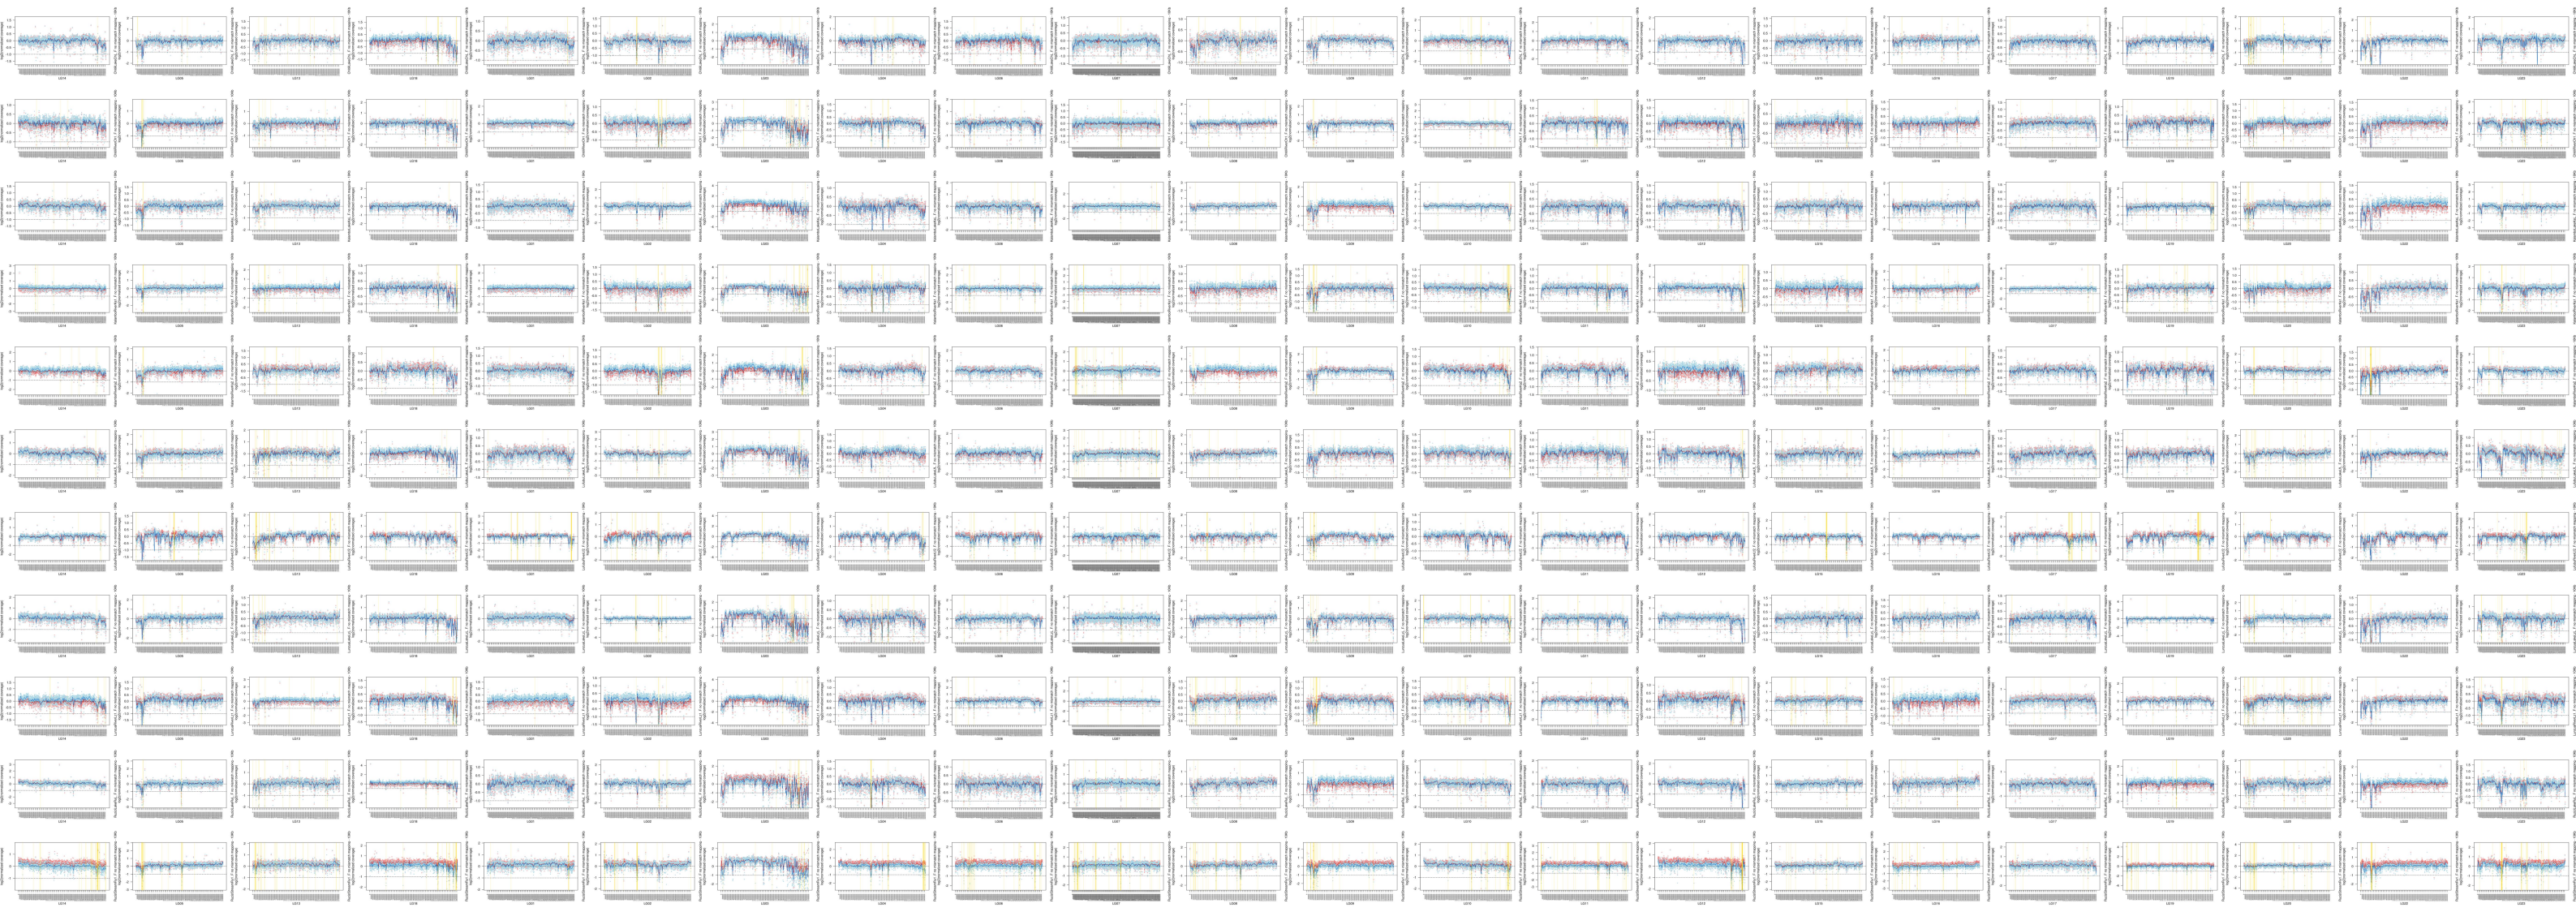

Supplement: Supplementary file 11 [file 1]
